# Supplementary material for: TNF promotes Th17 vaccine responses by enabling myeloid cell pattern recognition via Mincle
Source: Research Square preprint supplement (doi:10.21203/rs.3.rs-7495259/v1), 2025-09-25

# Supplemental material

| **Table S1: antibodies used in flow cytometry** | | | | | | | |
| --- | --- | --- | --- | --- | --- | --- | --- |
| **Target** | **Host Species** | **Isotype** | **Fluorophore** | **Dilution**  **1:x** | **Clone** | **Producer** | **Catalog Number** |
| CD11b | Rat | IgG2b, κ | FITC | 400 | M1/70 | BioLegend | 101206 |
| CD11b | Rat | IgG2b, κ | BV510 | 400 | M1/70 | BioLegend | 101245 |
| CD11c | Armenian Hamster | IgG | PE-Cy7 | 200 | N418 | BioLegend | 117318 |
| CD11c | Armenian Hamster | IgG | PerCp Cy5.5 | 100 | N418 | BioLegend | 117327 |
| CD11c | Armenian Hamster | IgG | BV421 | 400 | N418 | BioLegend | 117329 |
| CD19 | Rat | IgG2a, κ | BV421 | 100 | 6D5 | BioLegend | 115549 |
| CD19 | Rat | IgG2a, κ | APC eF780 | 400 | eBio1D3 | invitrogen | 47-0193-82 |
| CD19 | Rat | IgG2a, κ | FITC | 100 | 6D5 | BioLegend | 115505 |
| CD19 | Rat | IgG2a, κ | PE | 50 | 6D5 | BioLegend | 115507 |
| CD26 | Rat | IgG2a, κ | FITC | 100 | H194-112 | BioLegend | 137806 |
| CD3 | Armenian Hamster | IgG | BV421 | 100 | 145-2C11 | BioLegend | 100335 |
| CD3 | Armenian Hamster | IgG | FITC | 100 | 145-2C11 | BioLegend | 100305 |
| CD3 | Armenian Hamster | IgG | APC eF780 | 400 | 145-2C11 | invitrogen | 47-0031-82 |
| CD3 | Armenian Hamster | IgG | BUV 737 | 100 | 145-2C11 | BD | 612771 |
| CD4 | Rat | IgG2b, κ | FITC | 400 | GK1.5 | BioLegend | 100405 |
| CD64 | Mouse | IgG1, κ | PE-Cy7 | 100 | X54-5/7.1 | BioLegend | 139314 |
| CD8 | Rat | IgG2a, κ | APC eF780 | 100 | 53-6.7 | BioLegend | 100711 |
| CD8 | Rat | IgG2a, kappa | eF450 | 400 | 53-6.7 | eBioscience | 48-0081-82 |
| CD88 | Rat | IgG2b, κ | APC | 100 | 20/70 | BioLegend | 135807 |
| F4/80 | Rat | IgG2a, κ | APC | 100 | BM8 | BioLegend | 123115 |
| F4/80 | Rat | IgG2a, κ | PE | 200 | BM8 | BioLegend | 123109 |
| gd TCR | Armenian Hamster | IgG | APC | 100 | GL3 | BioLegend | 118134 |
| IFNg | Rat | IgG1, κ | APC | 400 | XMG1.2 | eBioscience | 17-7311-82 |
| IL10 | Rat | IgG2b | PE | 100 | JES5-16E3 | BD | 561060 |
| IL17 | Rat | IgG2a, κ | PE-Cy7 | 100 | eBio17B7 | invitrogen | 25-7177-82 |
| Isotype control | Rat | IgG1 kappa | unconjugated | 200 | eBRG1 | invitrogen | 14-4301-82 |
| isotype control | Armenian Hamster | IgG | PE | 100 | HTK888 | BioLegend | 400907 |
| Ly6C | Rat | IgG2c, κ | perCP-Cy5.5 | 200 | HK1.4 | BioLegend | 128011 |
| Ly6G | Rat | IgG2a, κ | APC-Cy7 | 100 | 1A8 | BioLegend | 127624 |
| Ly6G | Rat | IgG2a, κ | PE-Cy7 | 400 | 1A8 | BioLegend | 127617 |
| MHC II (I:A/I:E) | Rat | IgG2a, κ | BUV395 | 400 | 2G9 | BD | 740295 |
| Mincle | Rat | IgG2a | unconjugated | 200 | 4A9 | MBL | D292-3 |
| NK1.1 | Mouse | IgG2a | BUV395 | 100 | PK136 | BD | 740771 |
| NK1.1 | Mouse | IgG2a | APC eF780 | 100 | PK136 | invitrogen | 47-5941-82 |
| NK1.1 | Mouse | IgG2a | PE-Cy7 | 100 | PK136 | eBioscience | 25-5941-82 |
| NK1.1 | Mouse | IgG2a | FITC | 100 | PK136 | eBioscience | 25-5941-82 |
| NKp46 | Rat | IgG2a, κ | PE | 100 | 29A1.4 | BioLegend | 137602 |
| rat IgG | mouse | IgG1 | APC | 100 | R1-12D10 | invitrogen | 17-4812-82 |
| TNFR1 | Rat | IgG1 | PE | 100 | 55R-286 | BioLegend | 113902 |
| XCR1 | Rat | IgG2a, κ | BV421 | 400 | ZET | BioLegend | 148212 |

| **Table S2: for the qPCR used primer and probes** | | | | |
| --- | --- | --- | --- | --- |
| **gene** | **primer forw** | **primer seq rev** | **probe** | **Supplier** |
| *Hprt* | cttacctcactgctttccgg | catcatcgctaatcacgacg | (6FAM) ttttgccgcgagccgaccggtcc (OQA) | Sigma-Aldrich |
| *Mincle* | accagatgtgtcgtaaca | tccagttcaaaggacagc | (6FAM) ttgactgaacctgatgcctcact (BHQ1) | Sigma-Aldrich |
| *IL6* | gctaccaaactggatataatcagga | ccaggtagctatggtactccagaa | universal Probe 6 | Roche |
| *Il1b* | ttgacggaccccaaaagat | agctggatgctctcatcagg | universal Probe 38 | Roche |


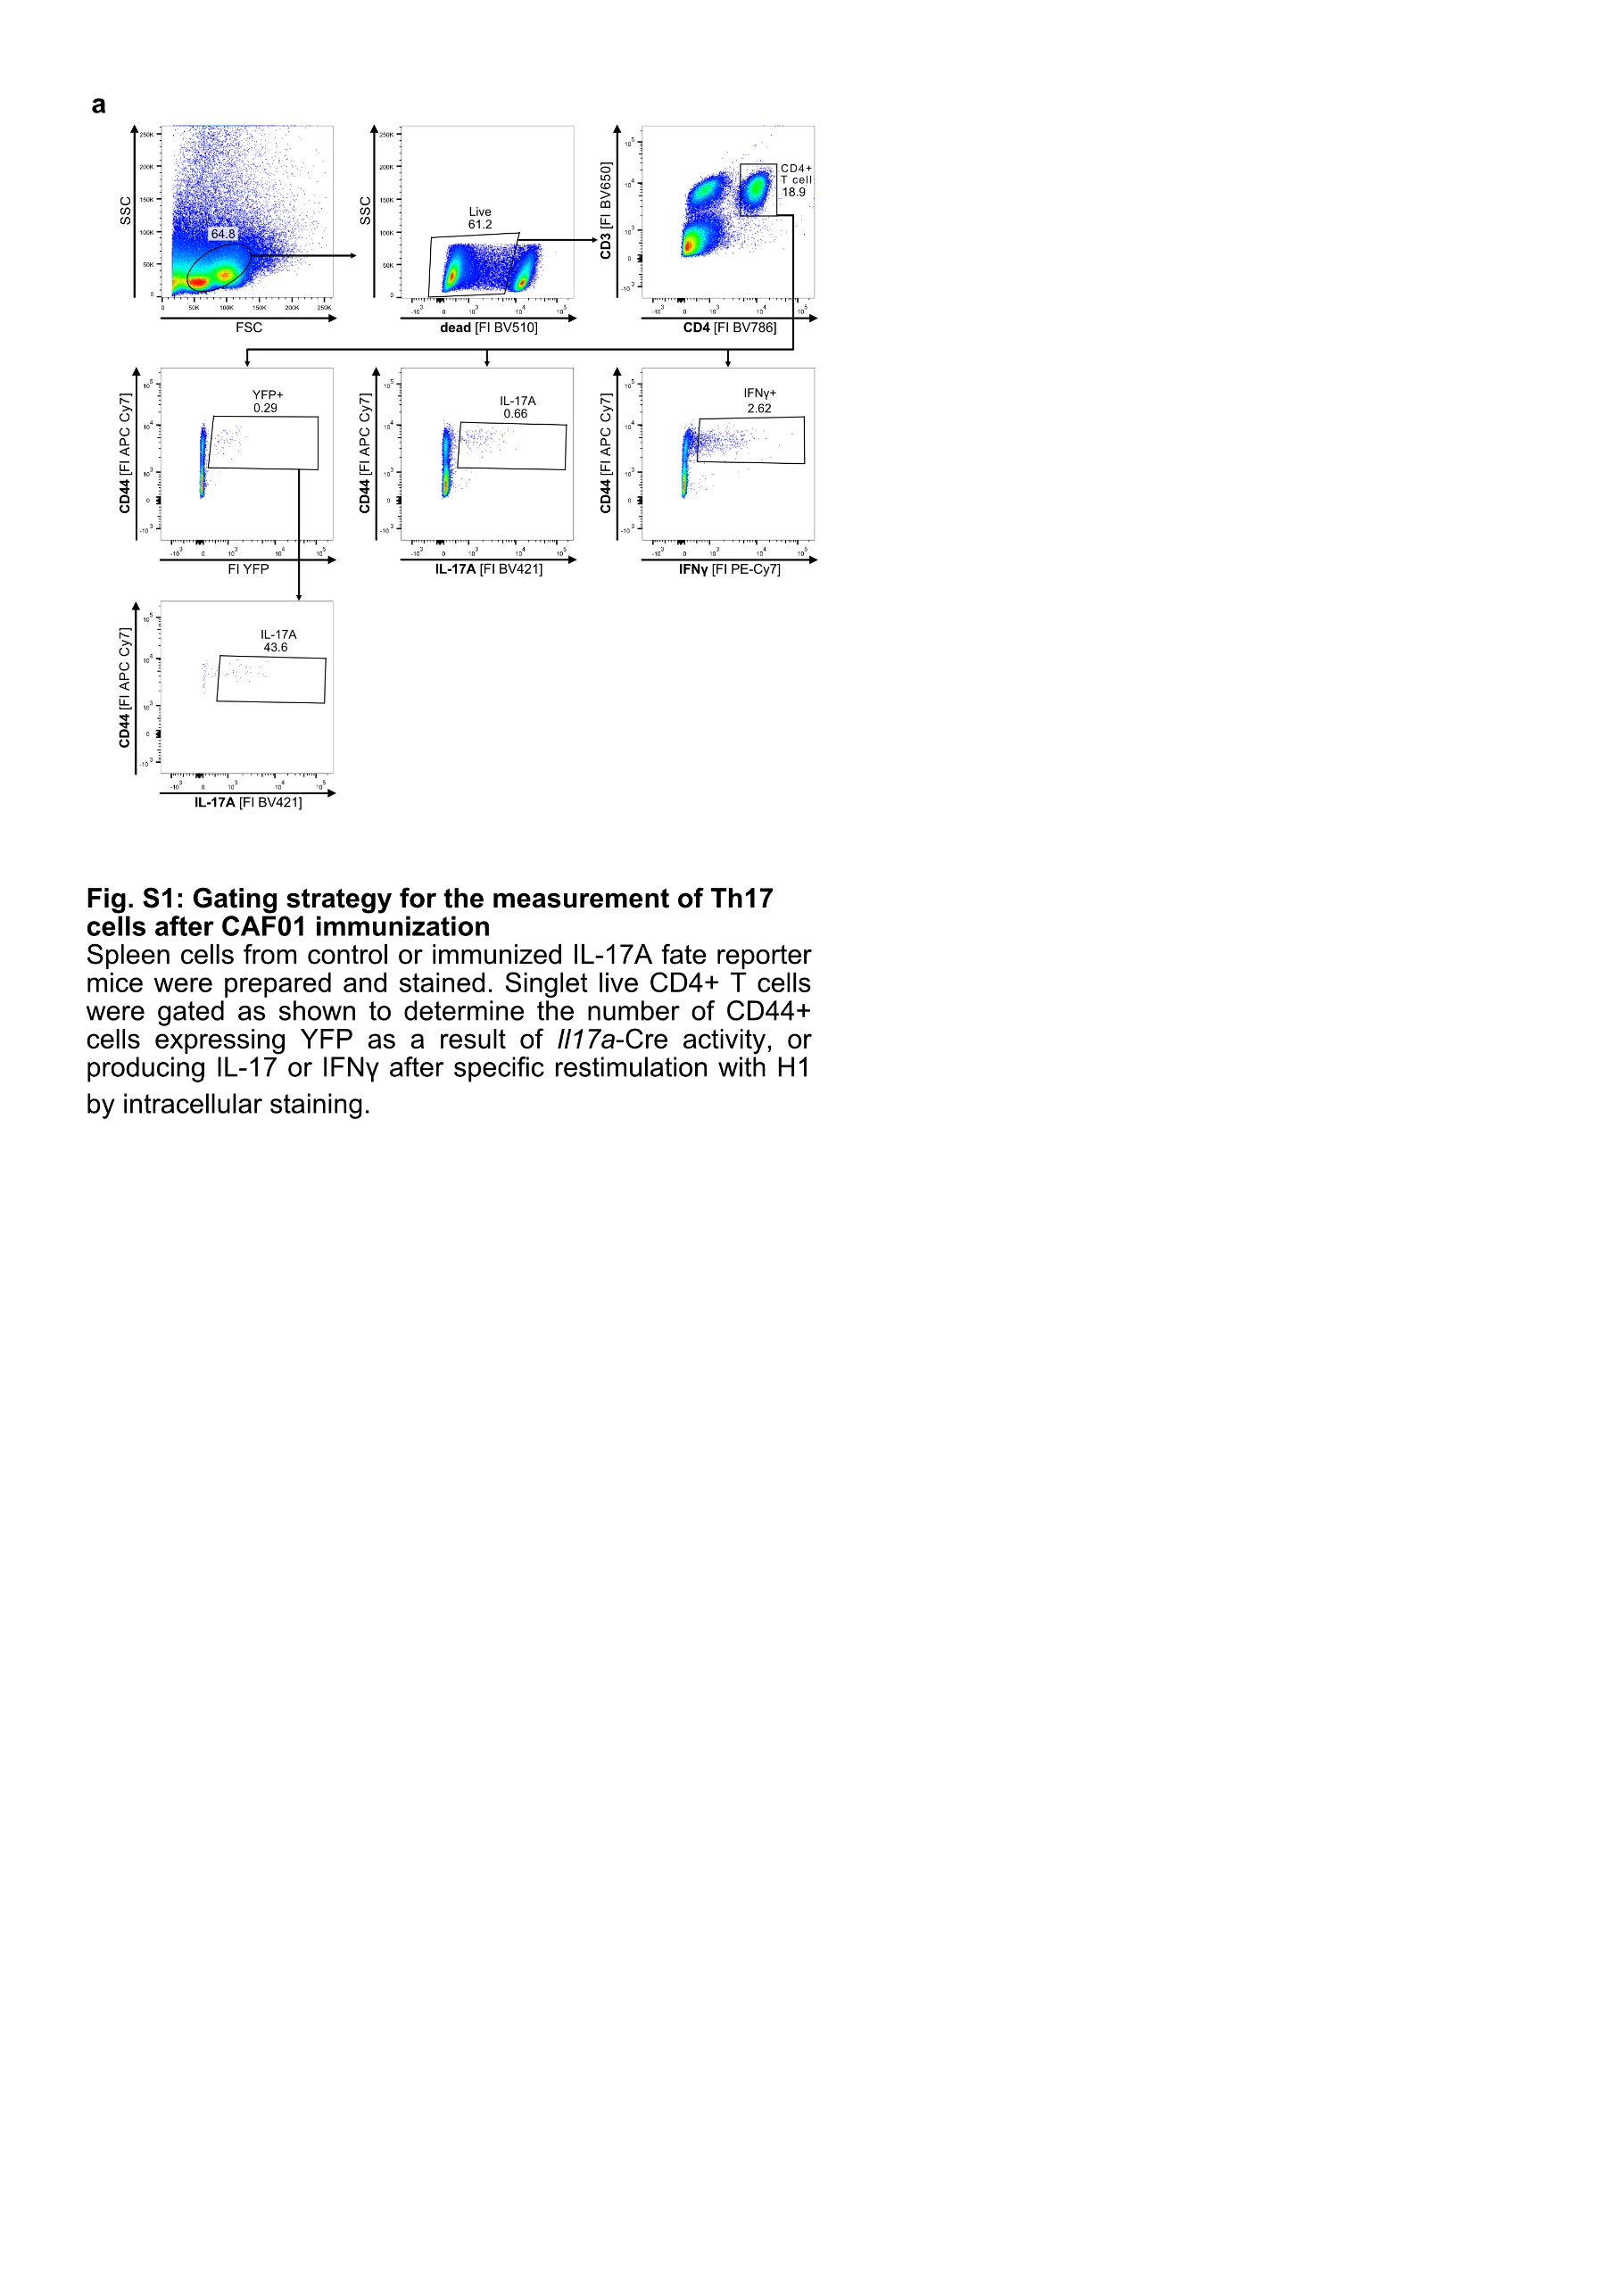


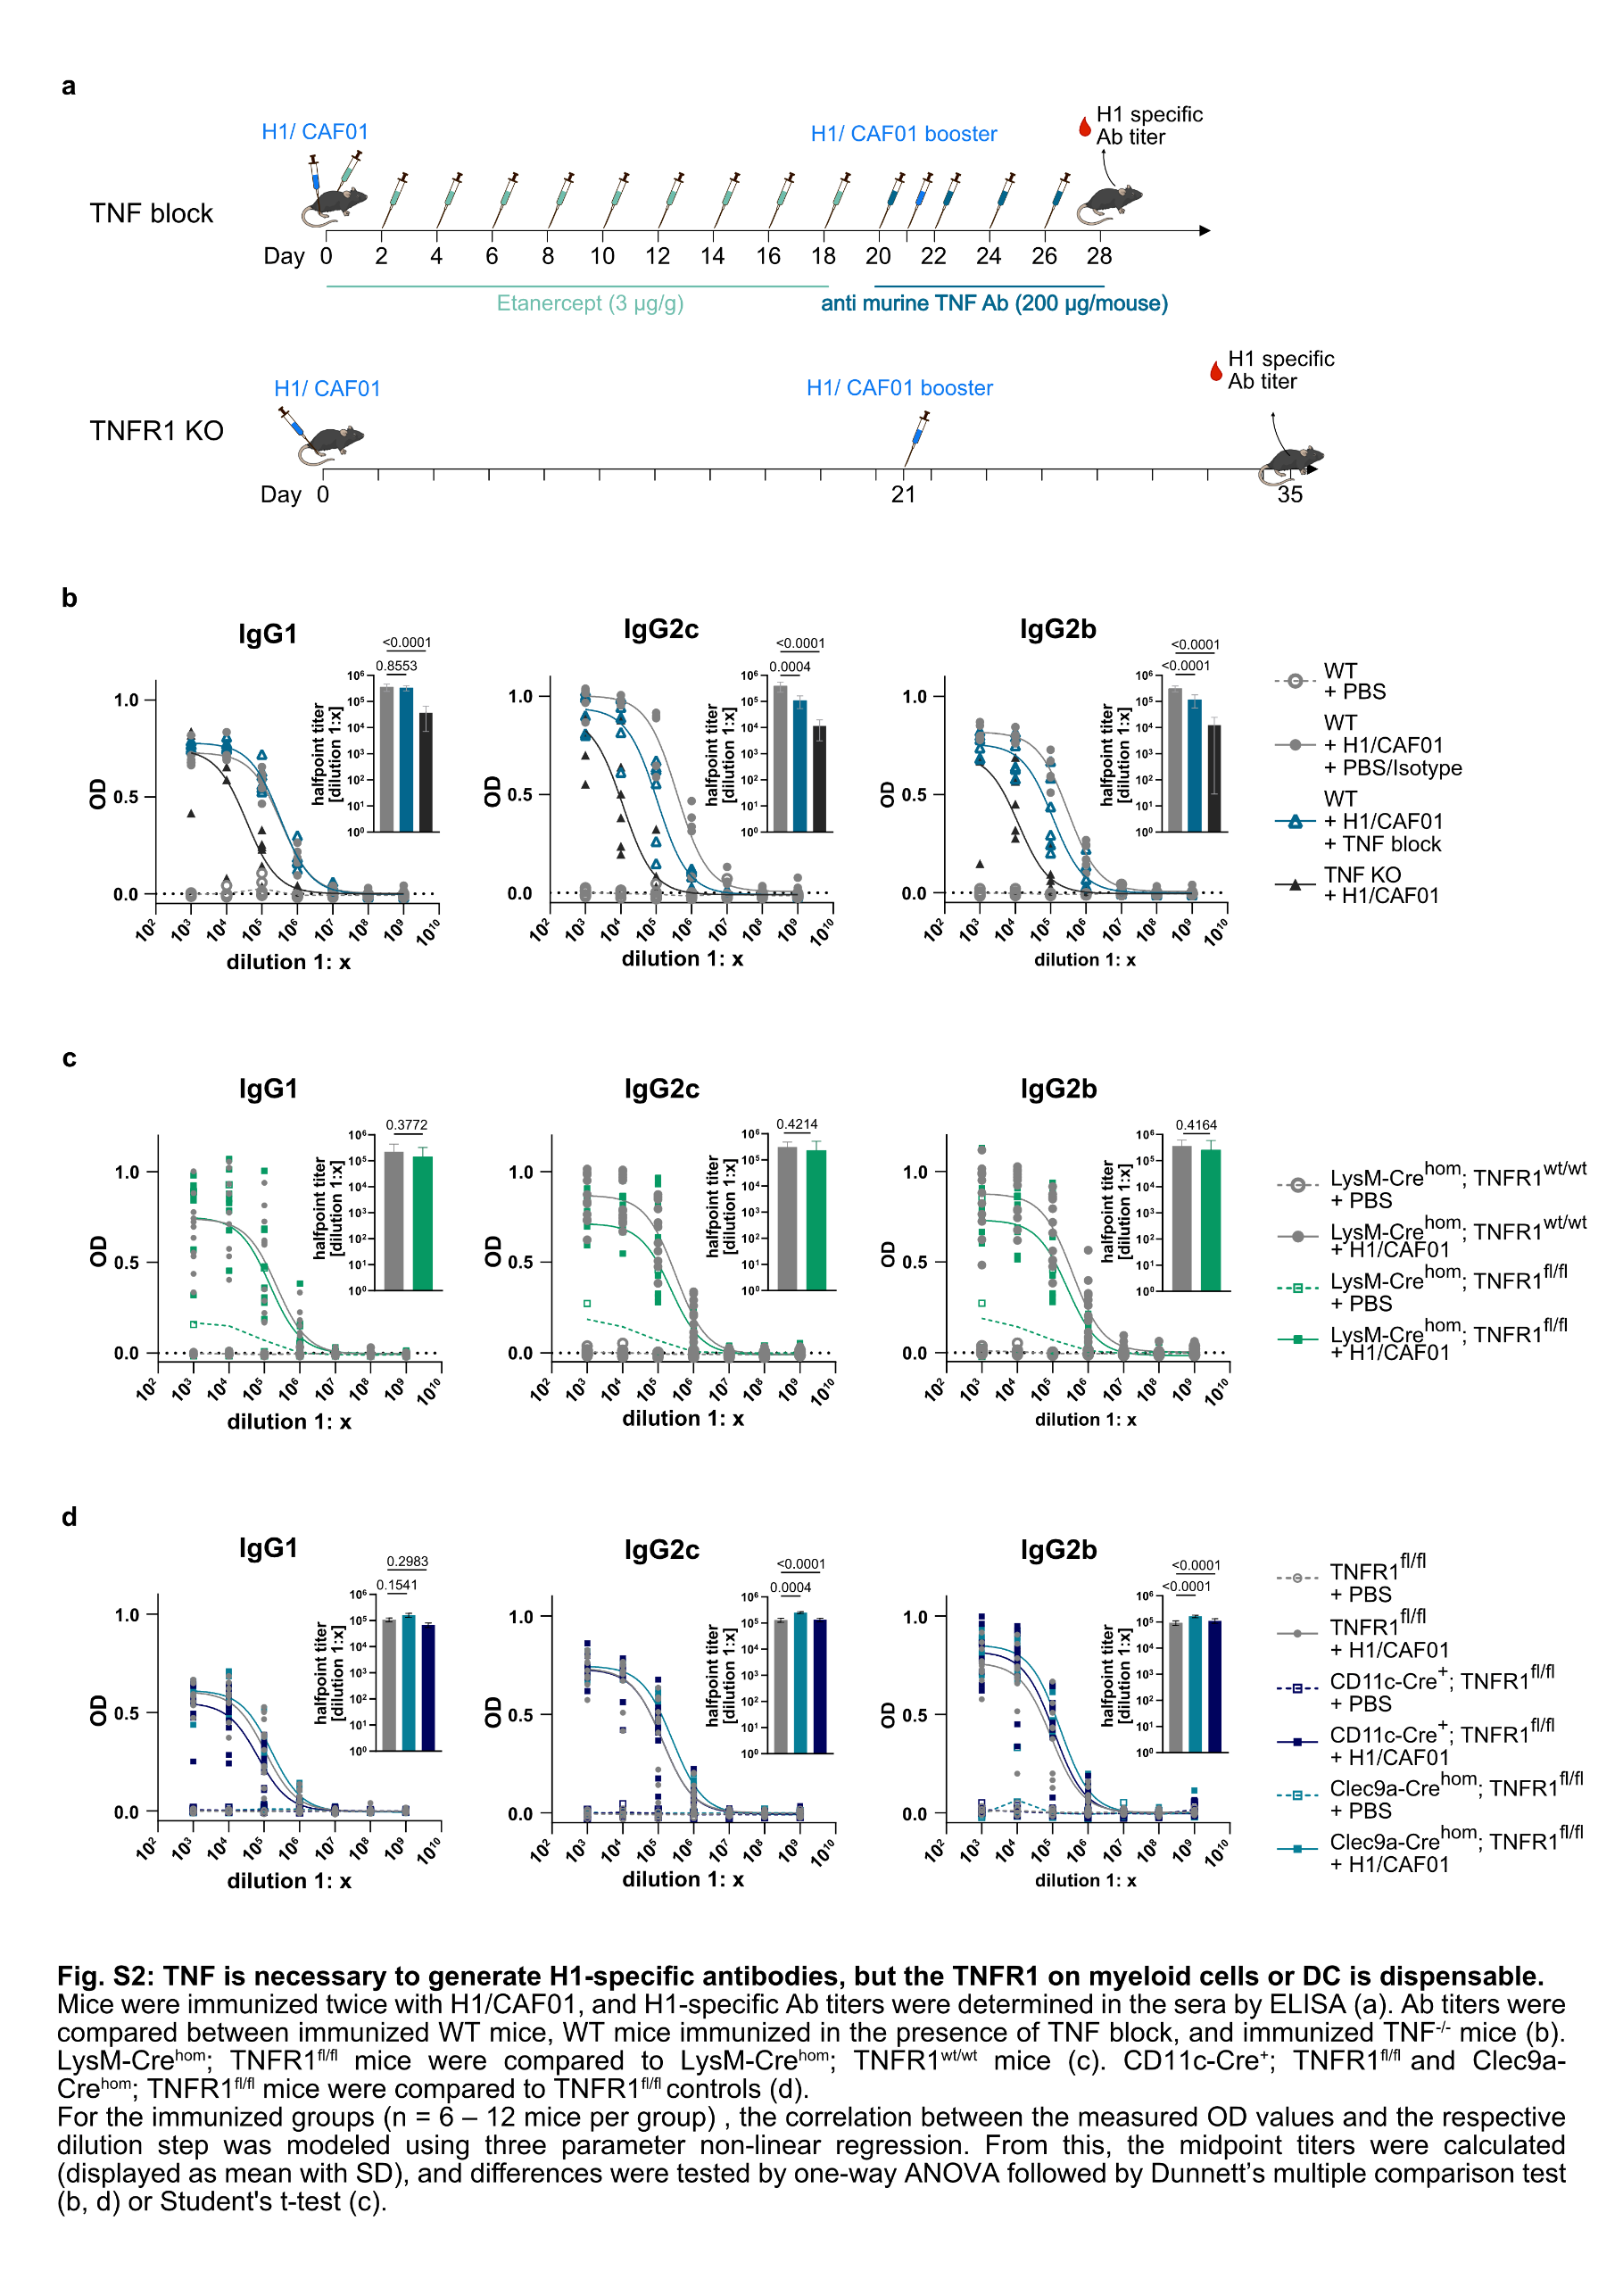


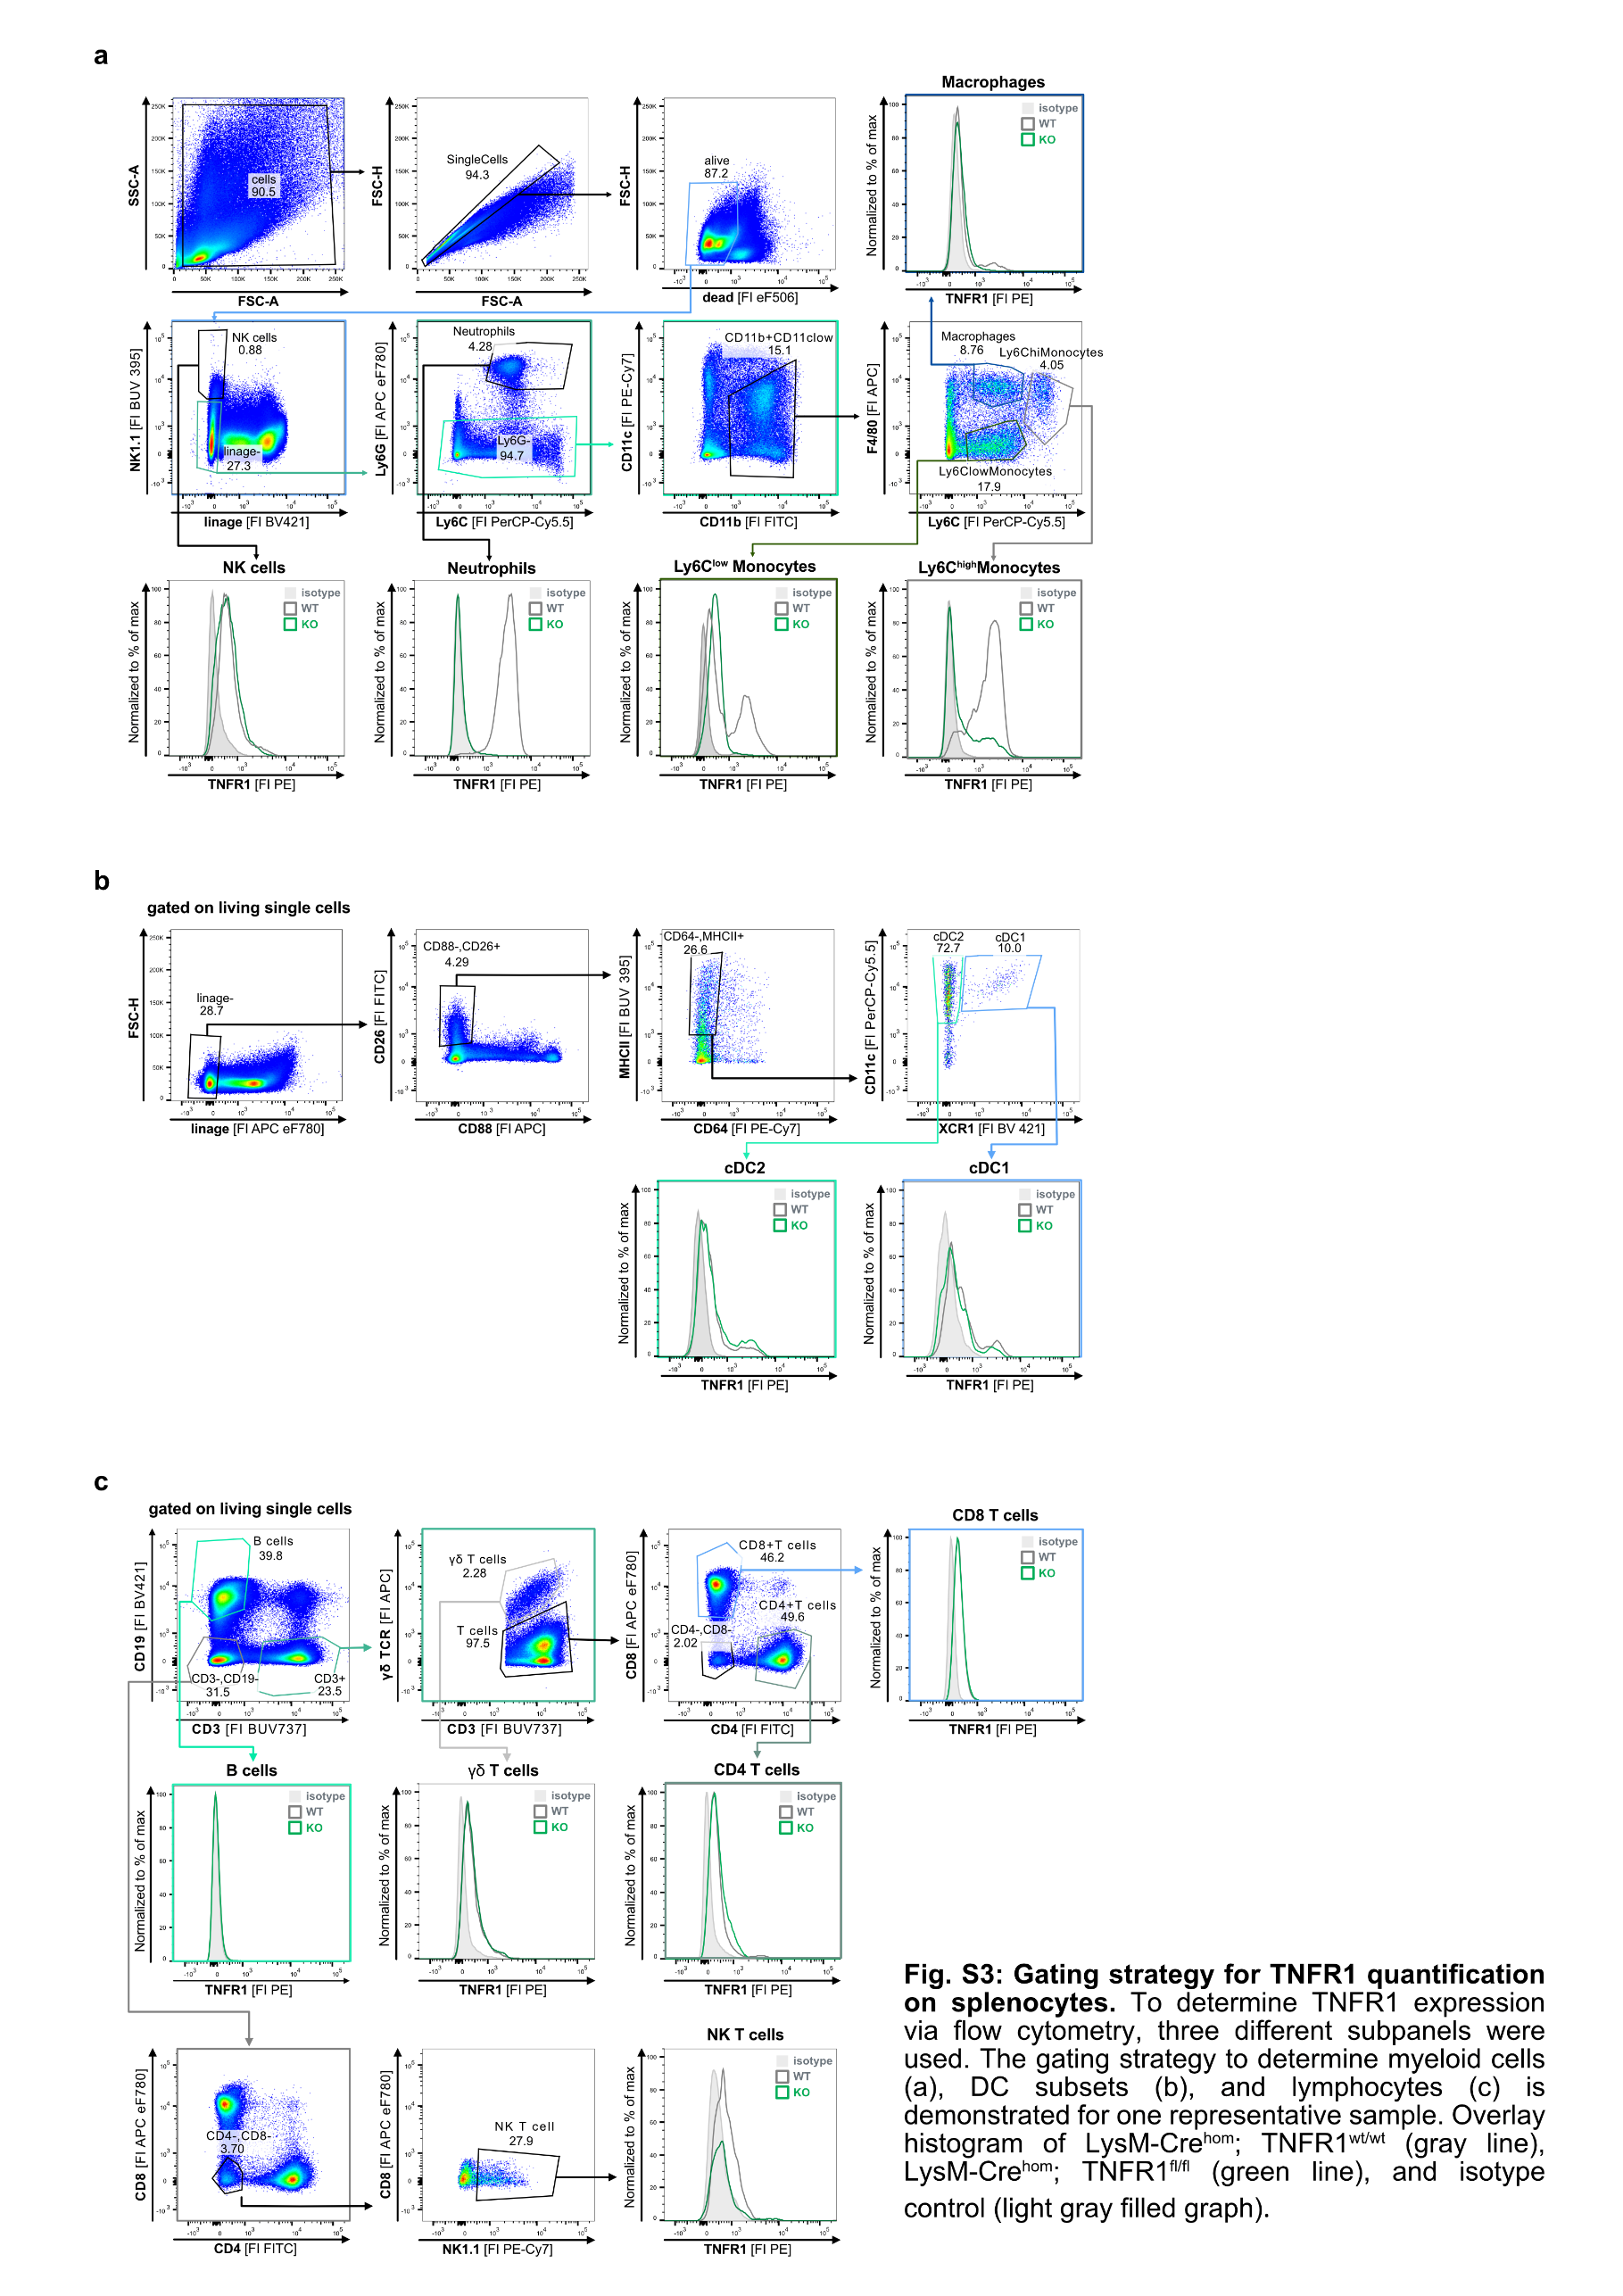


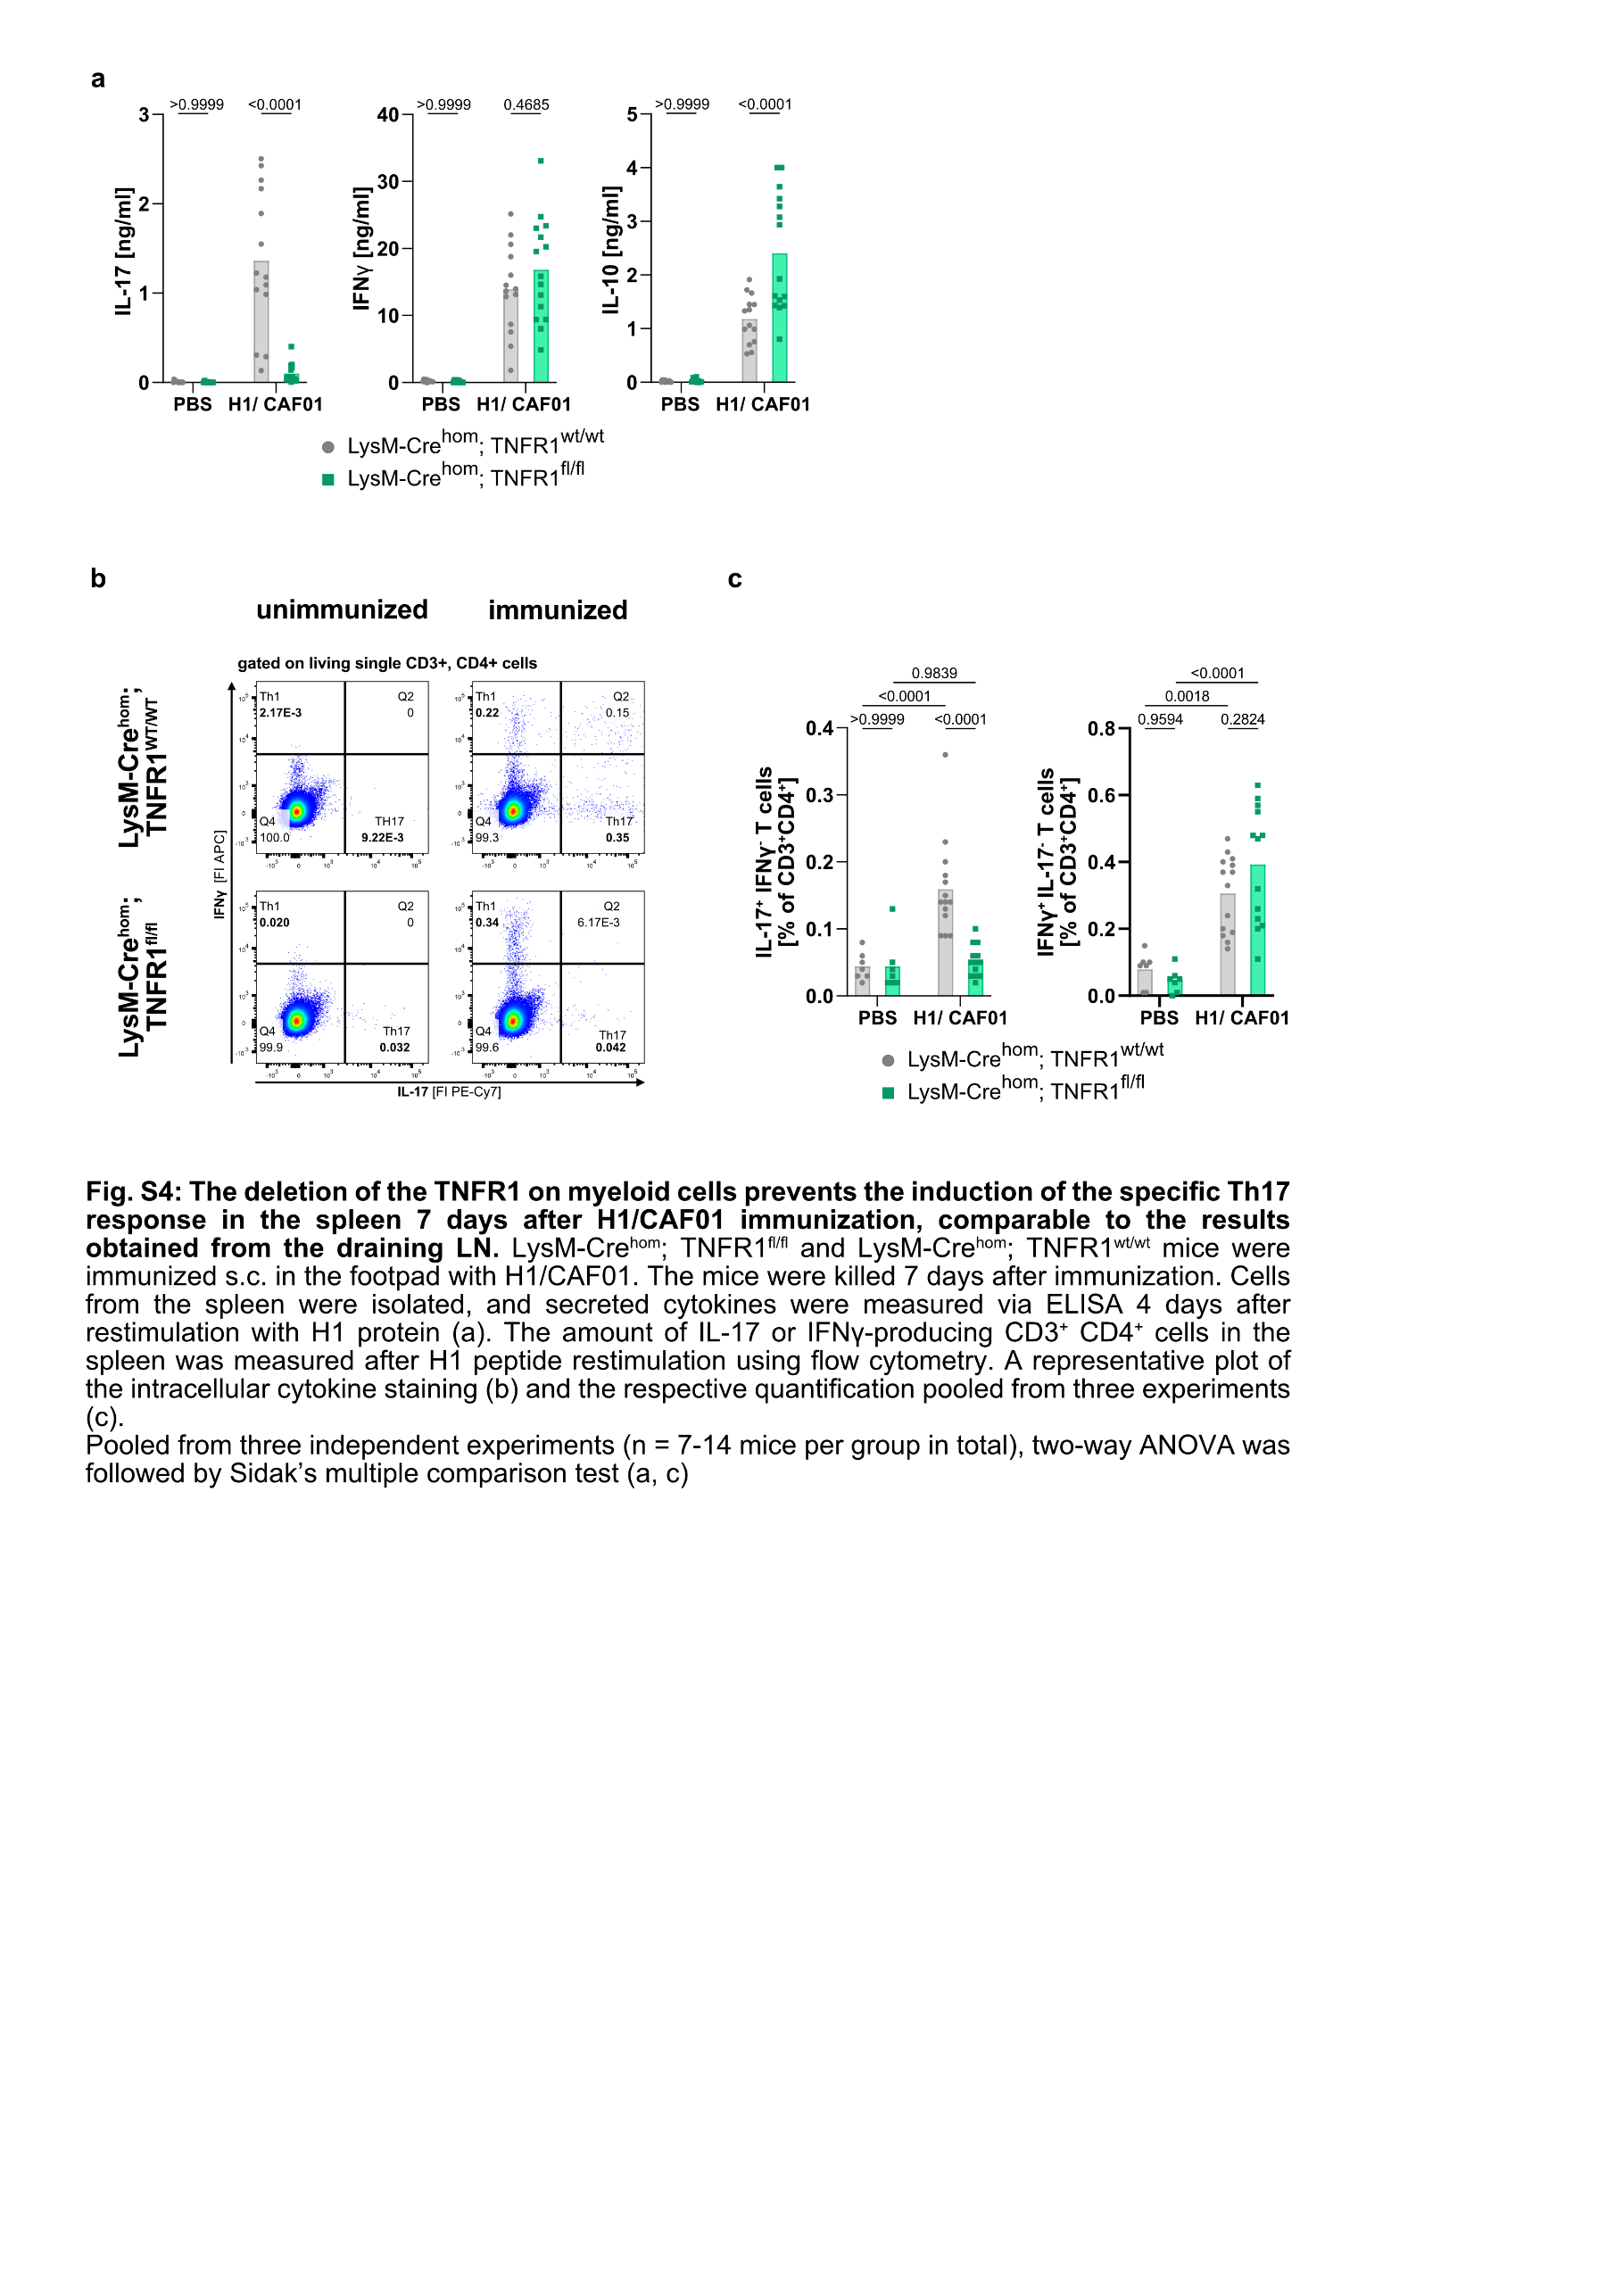


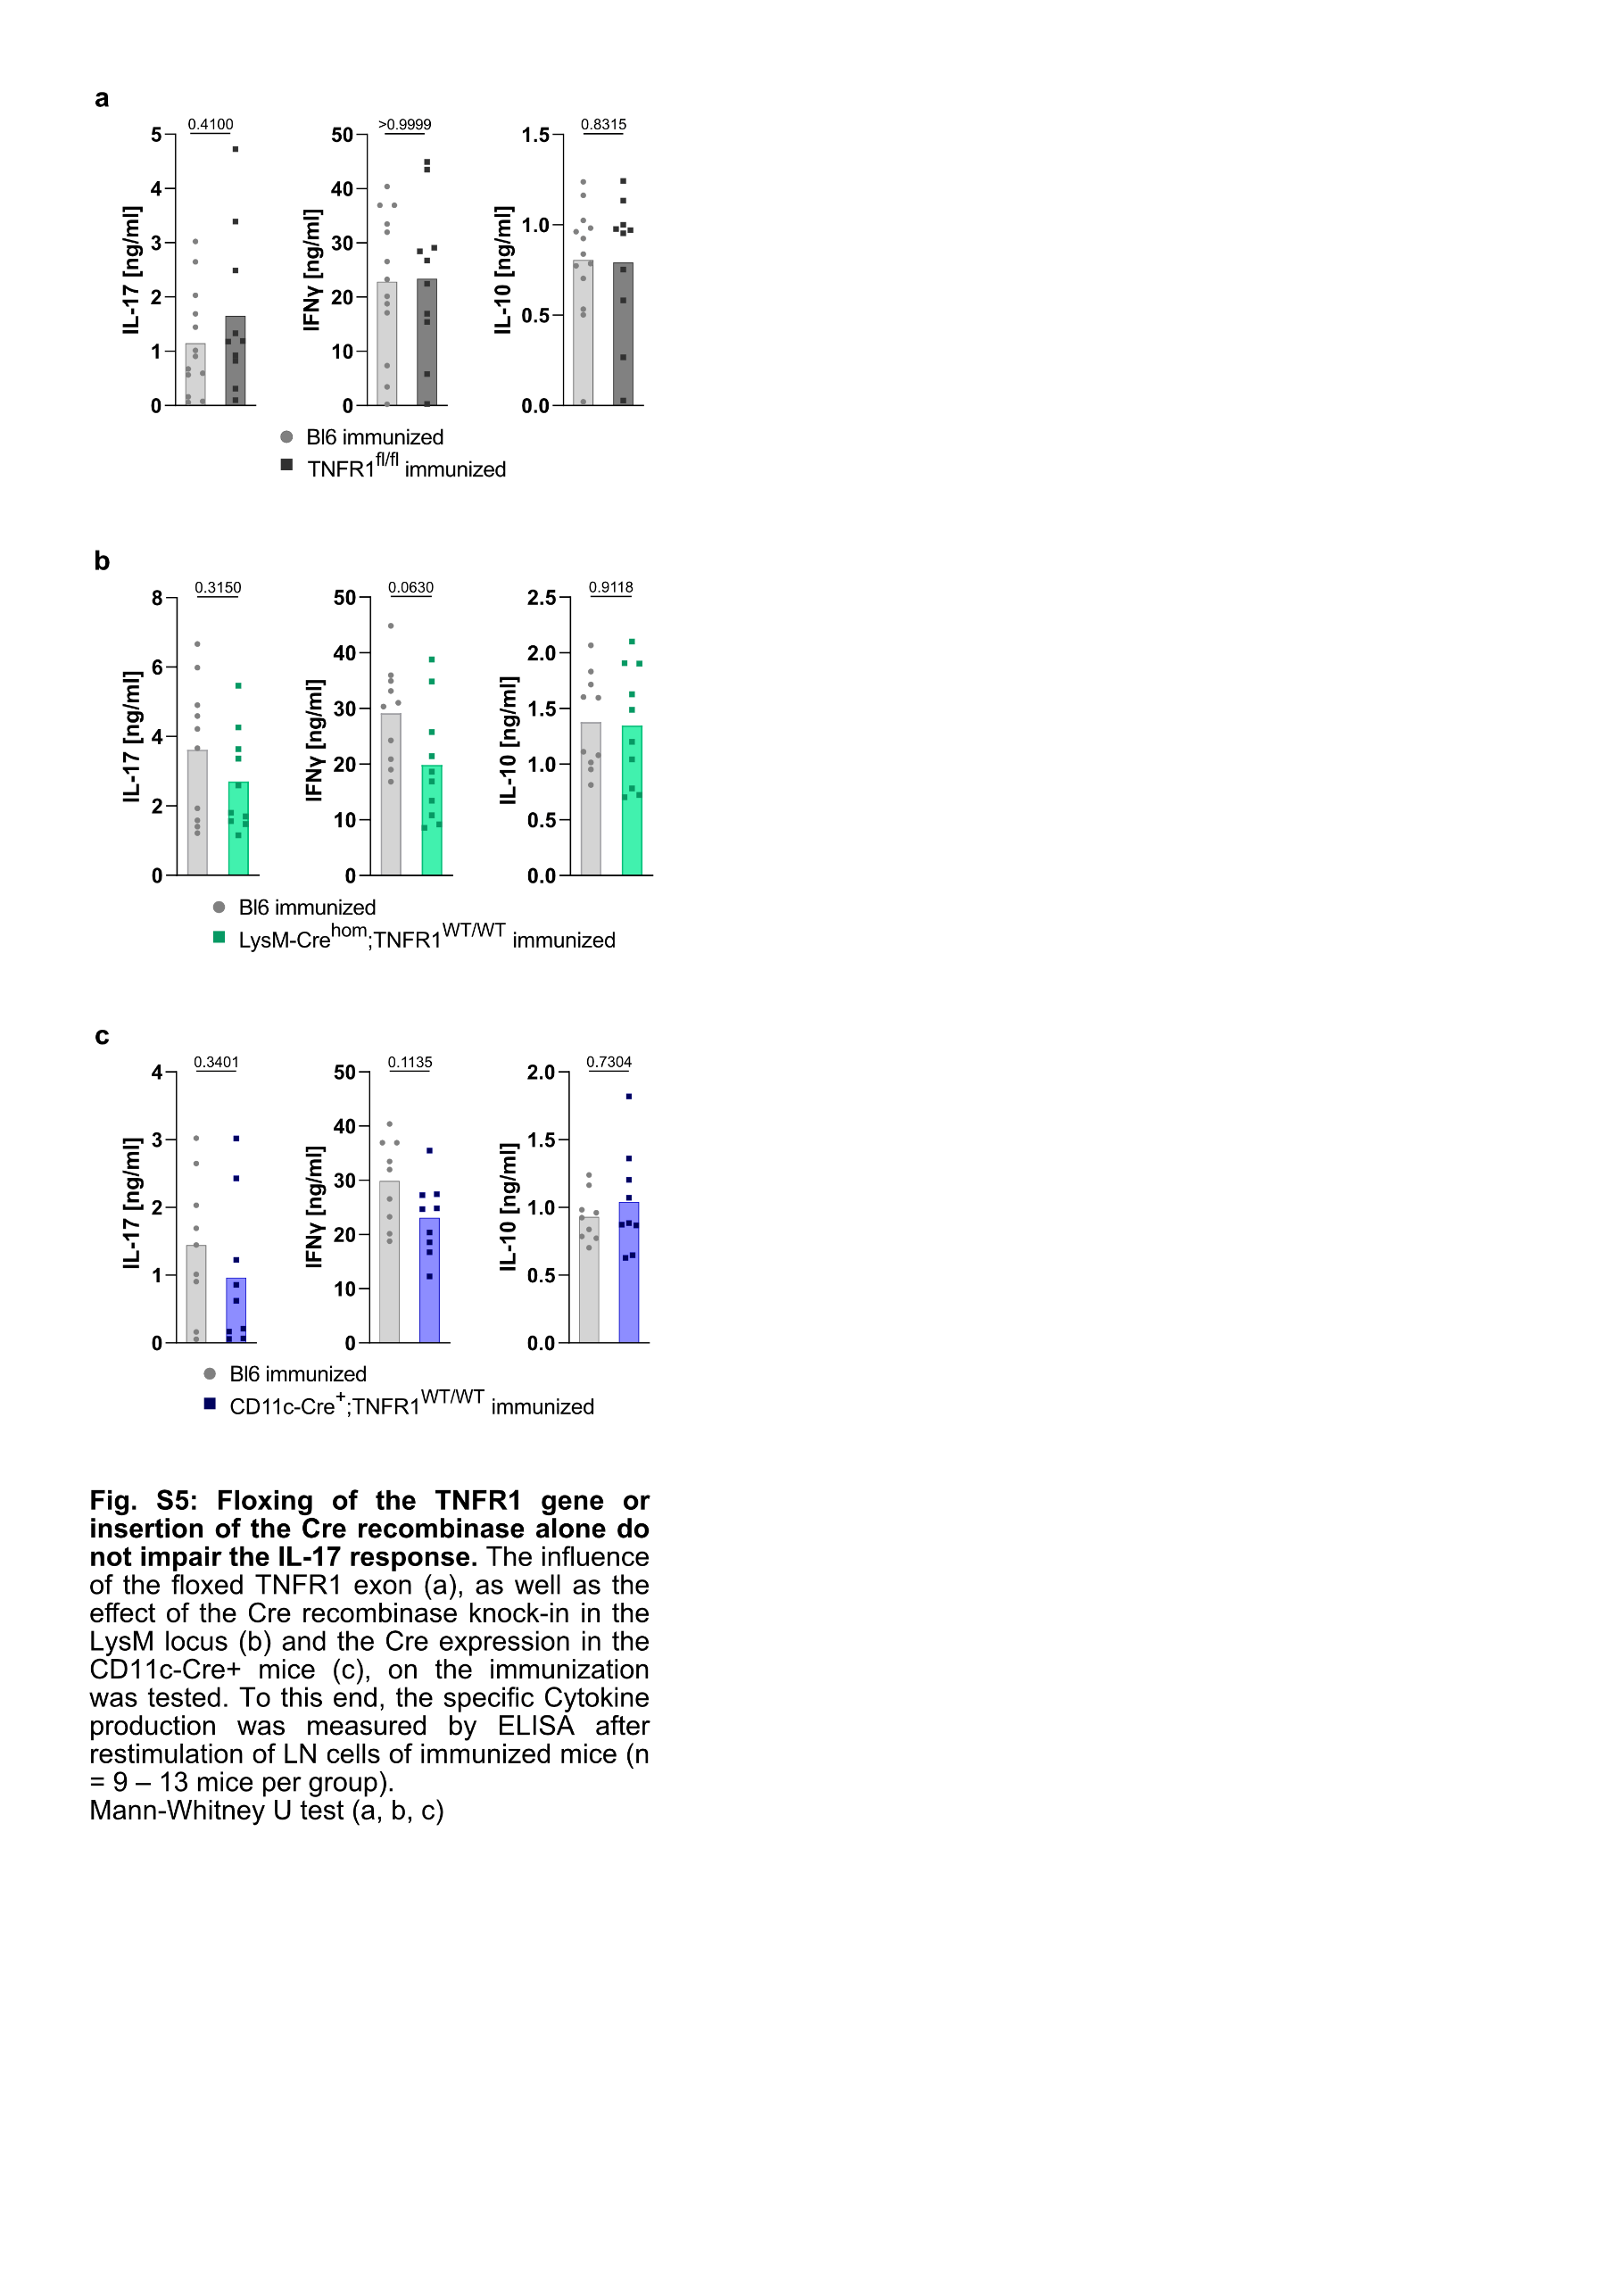


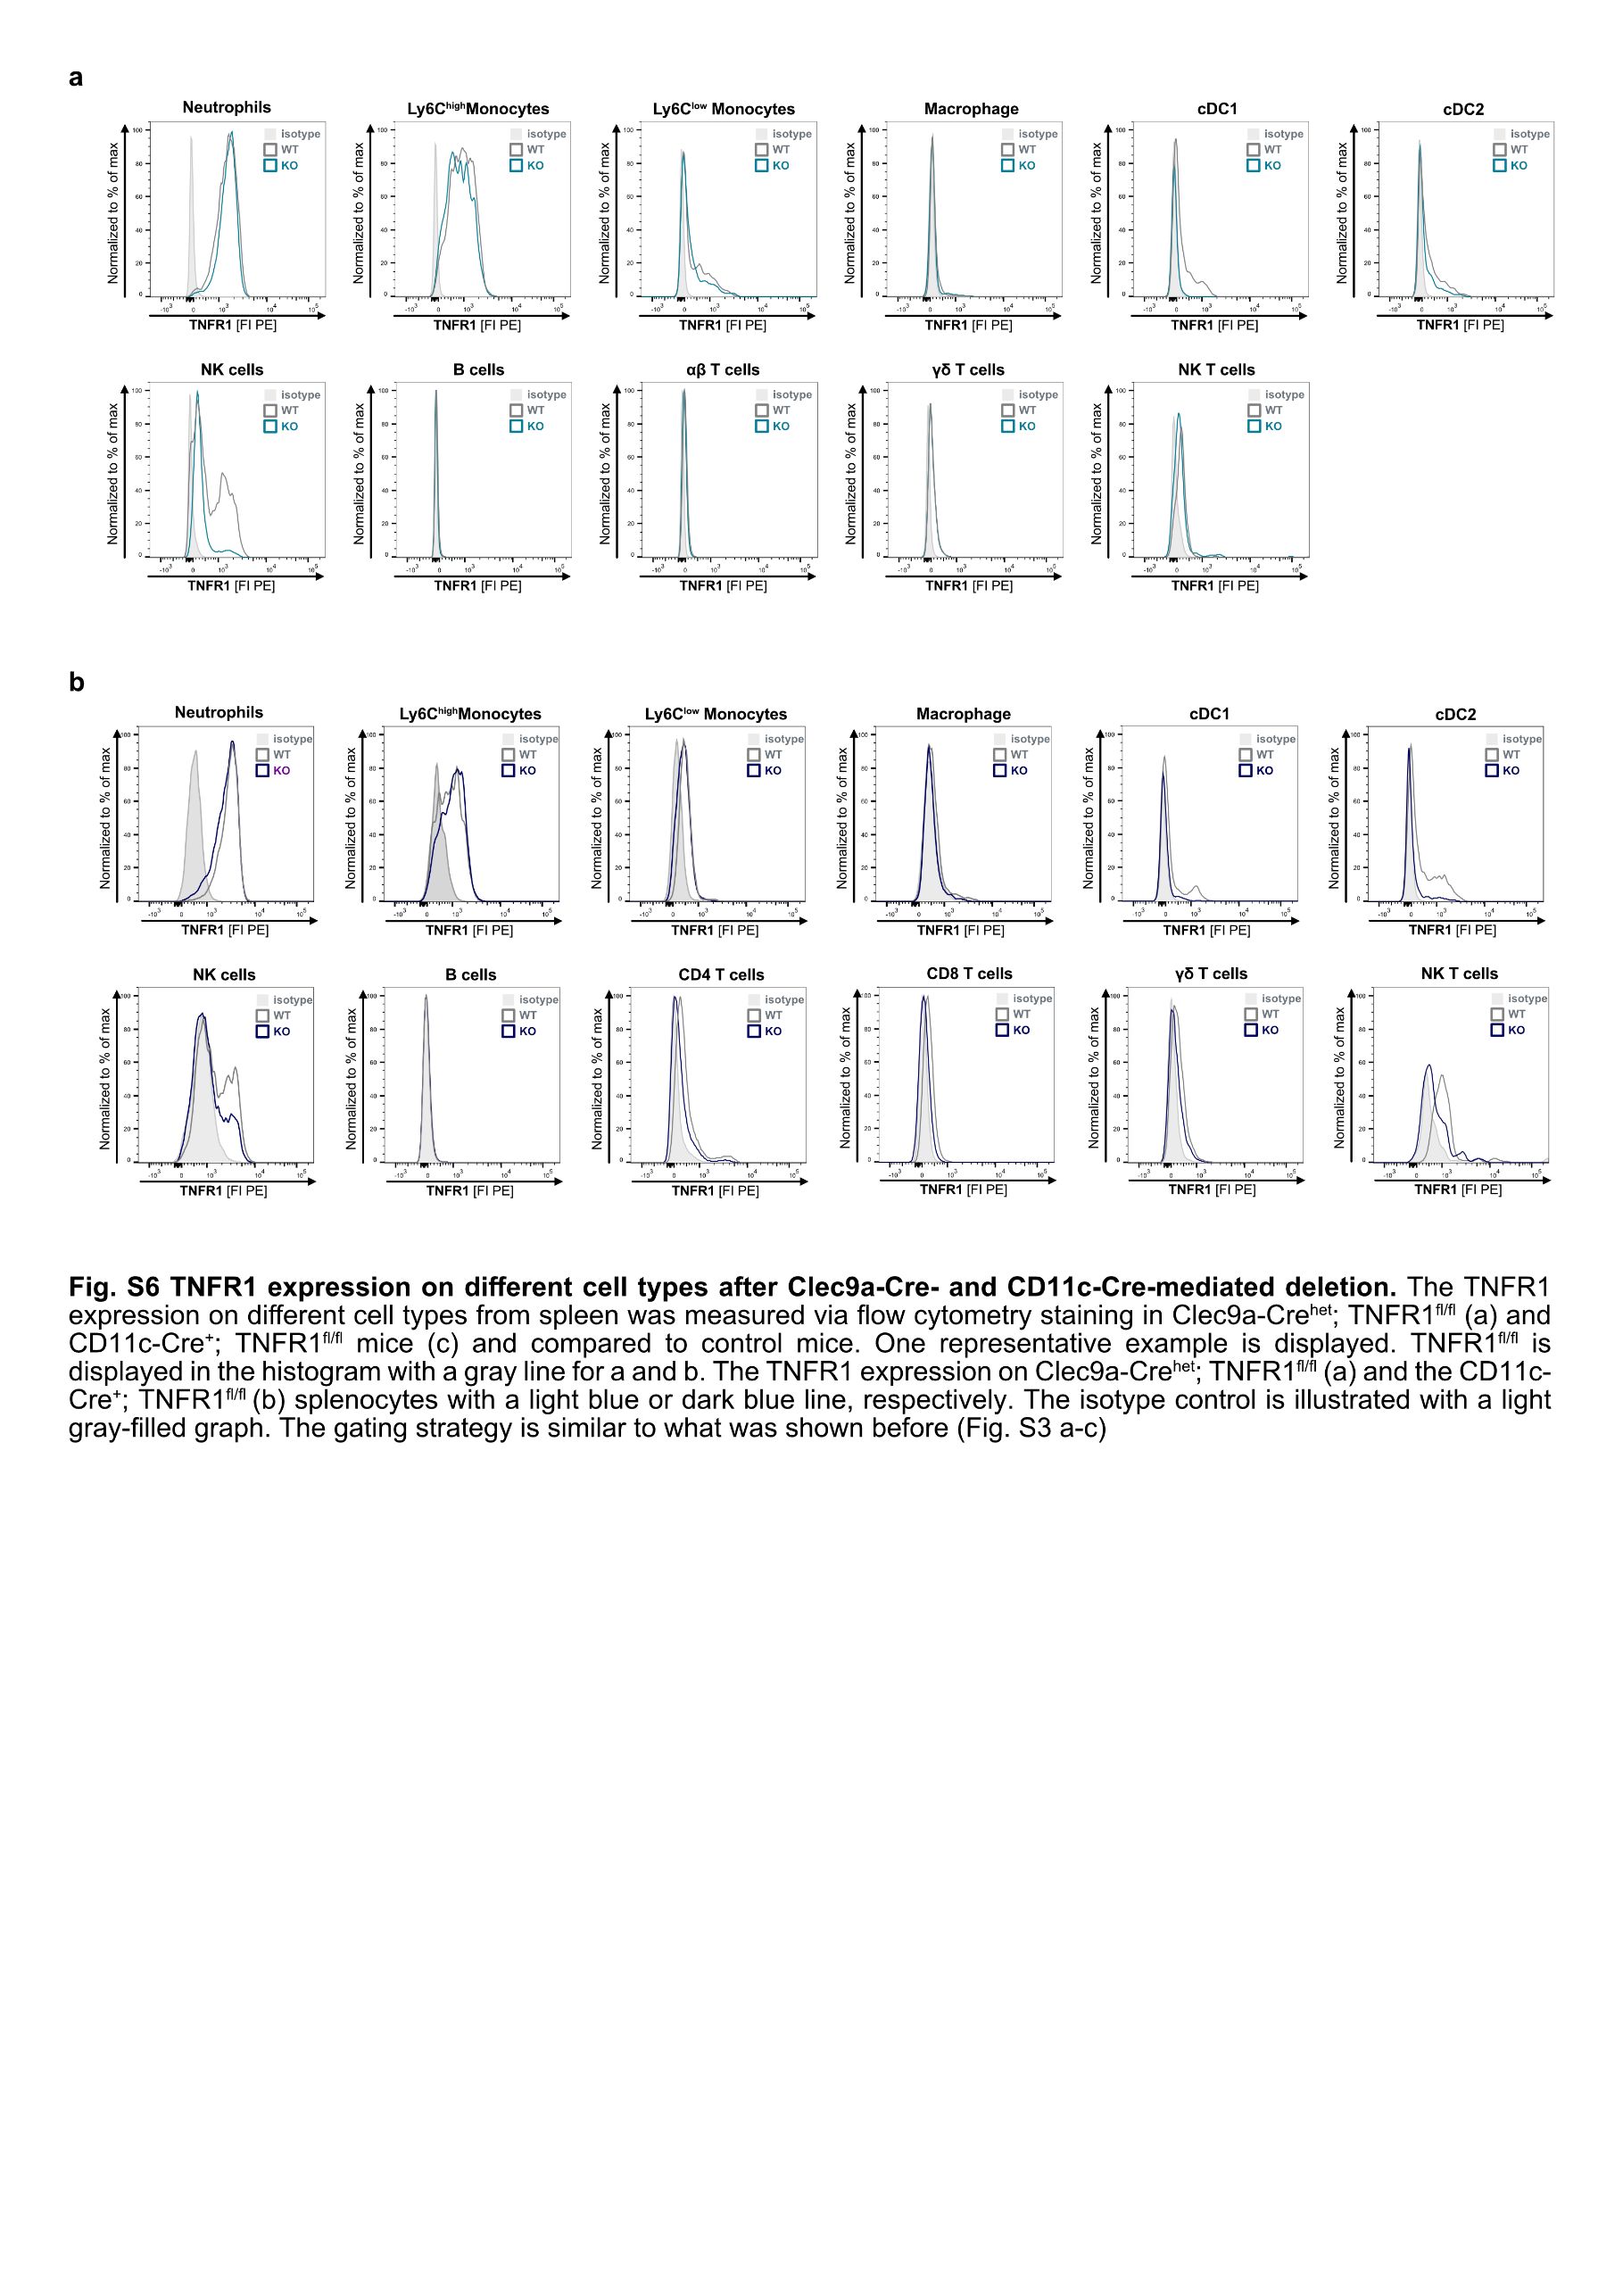


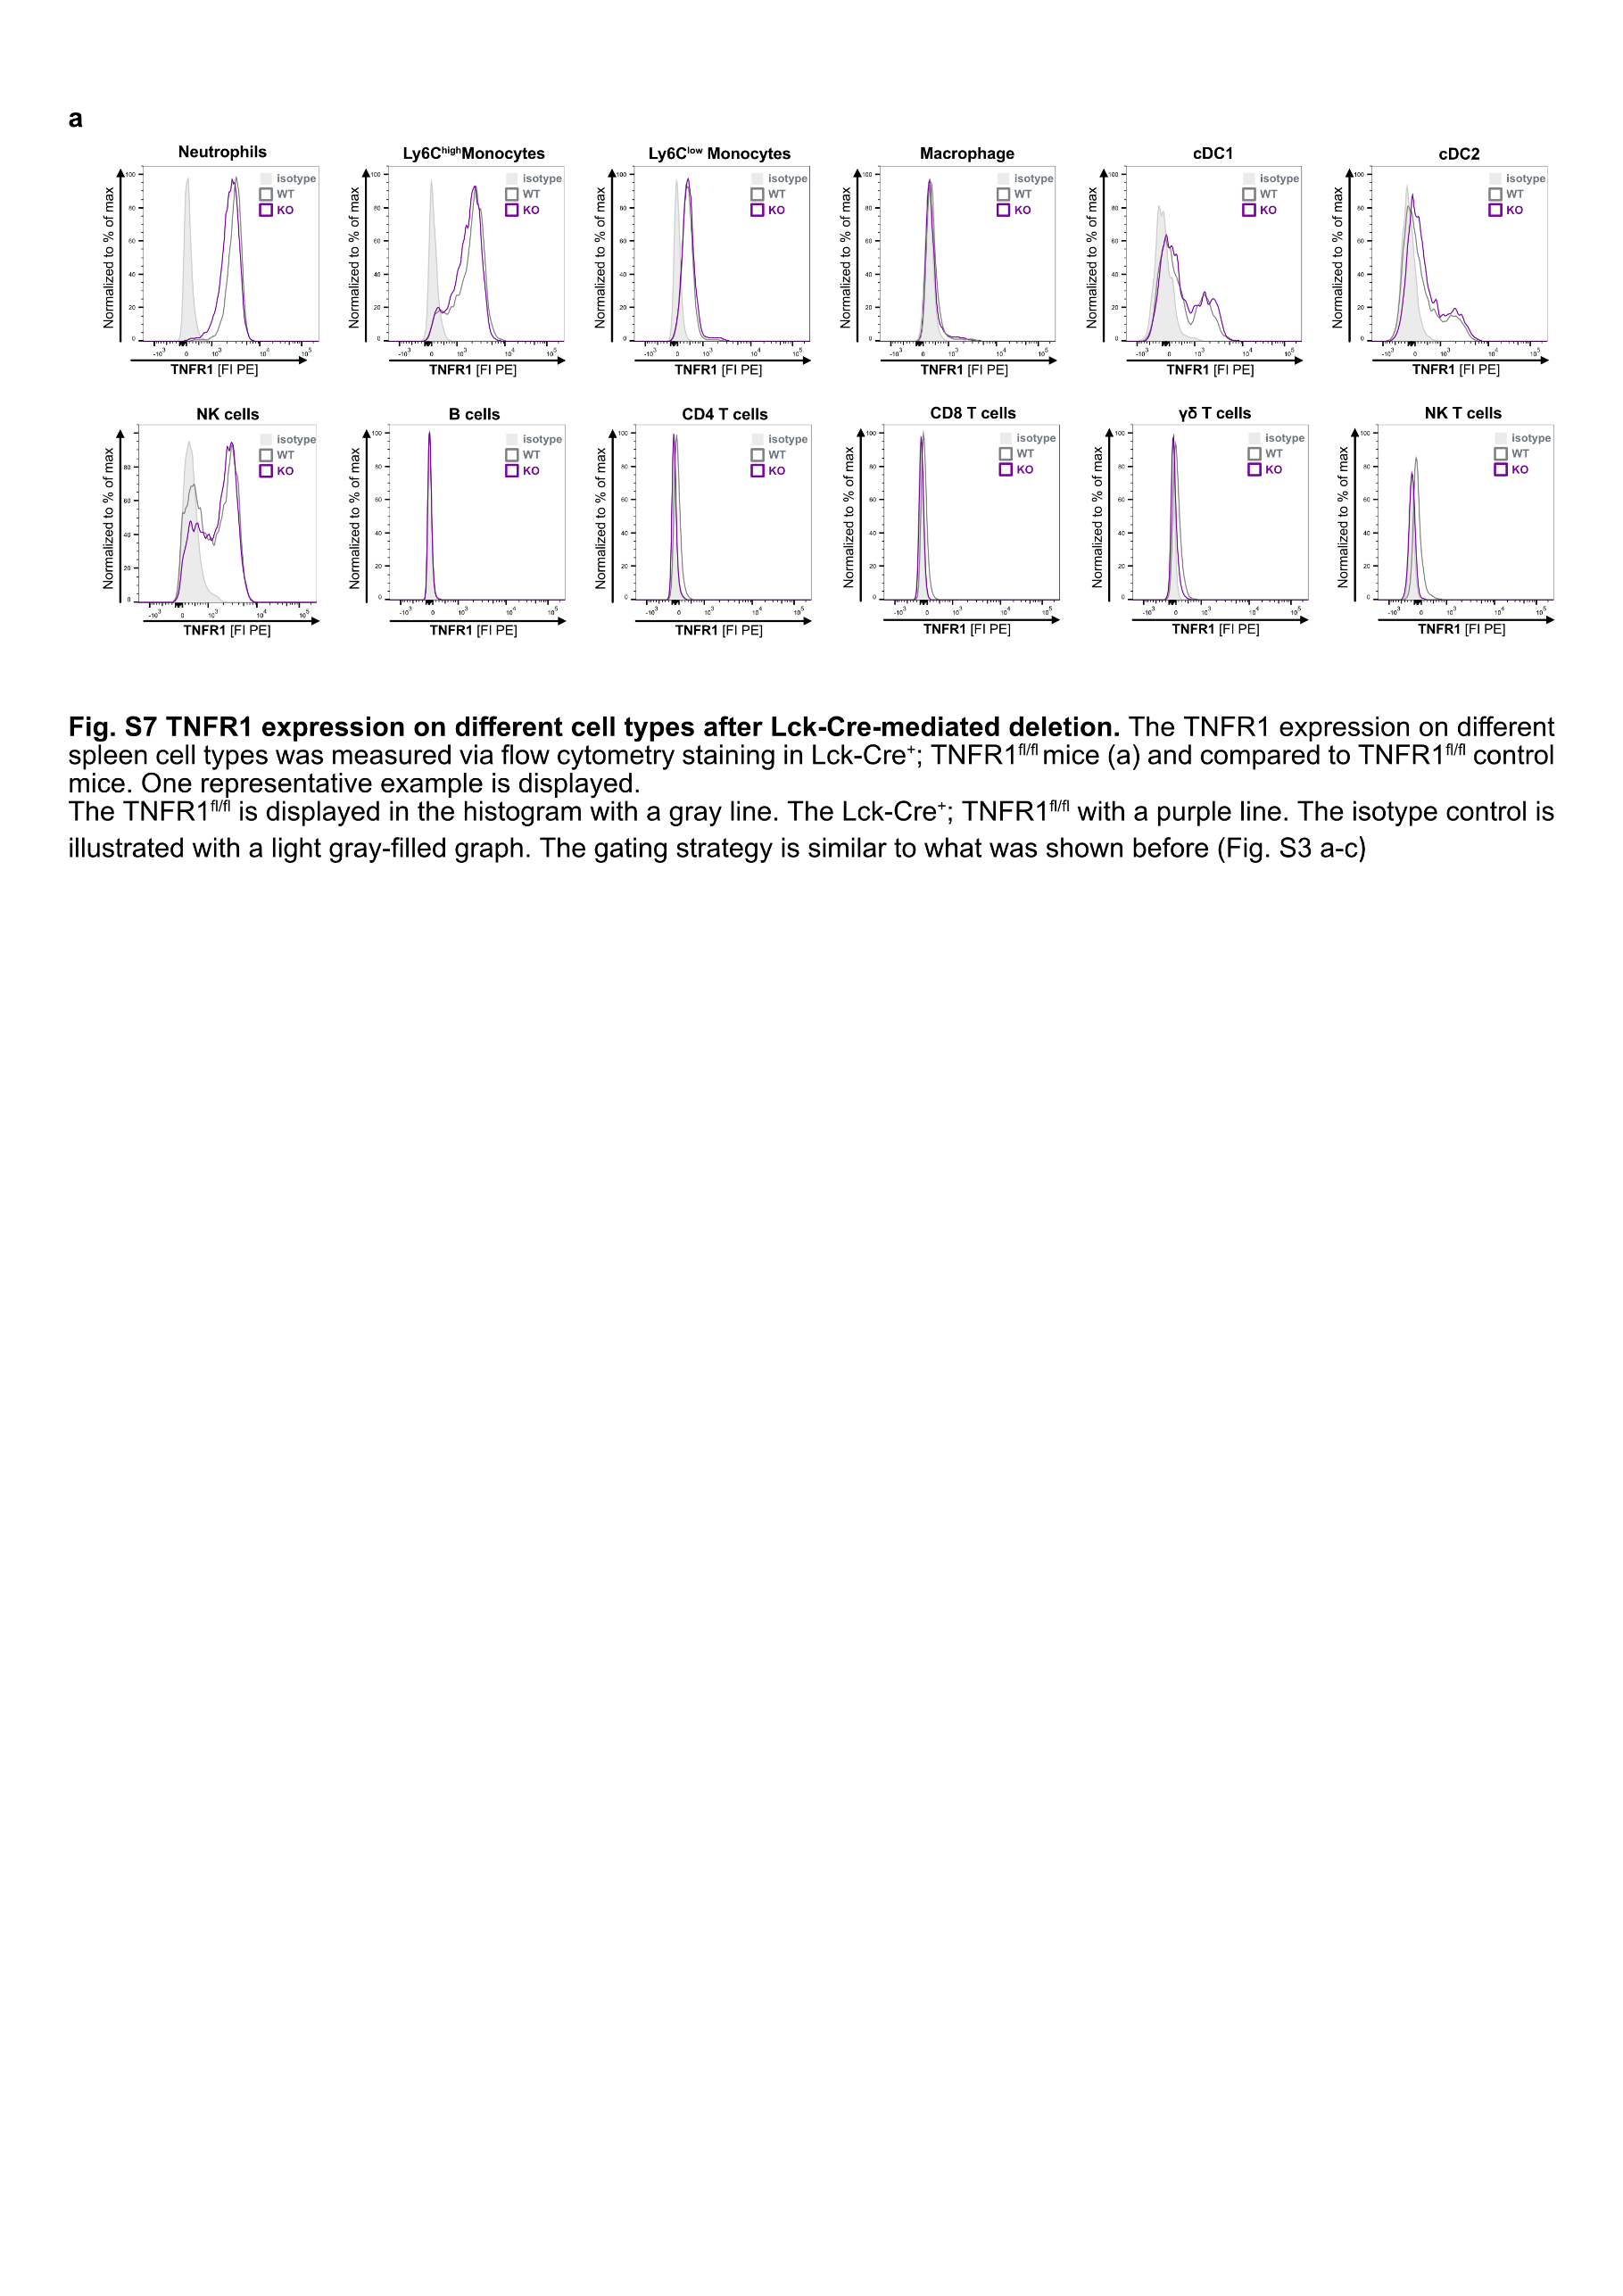


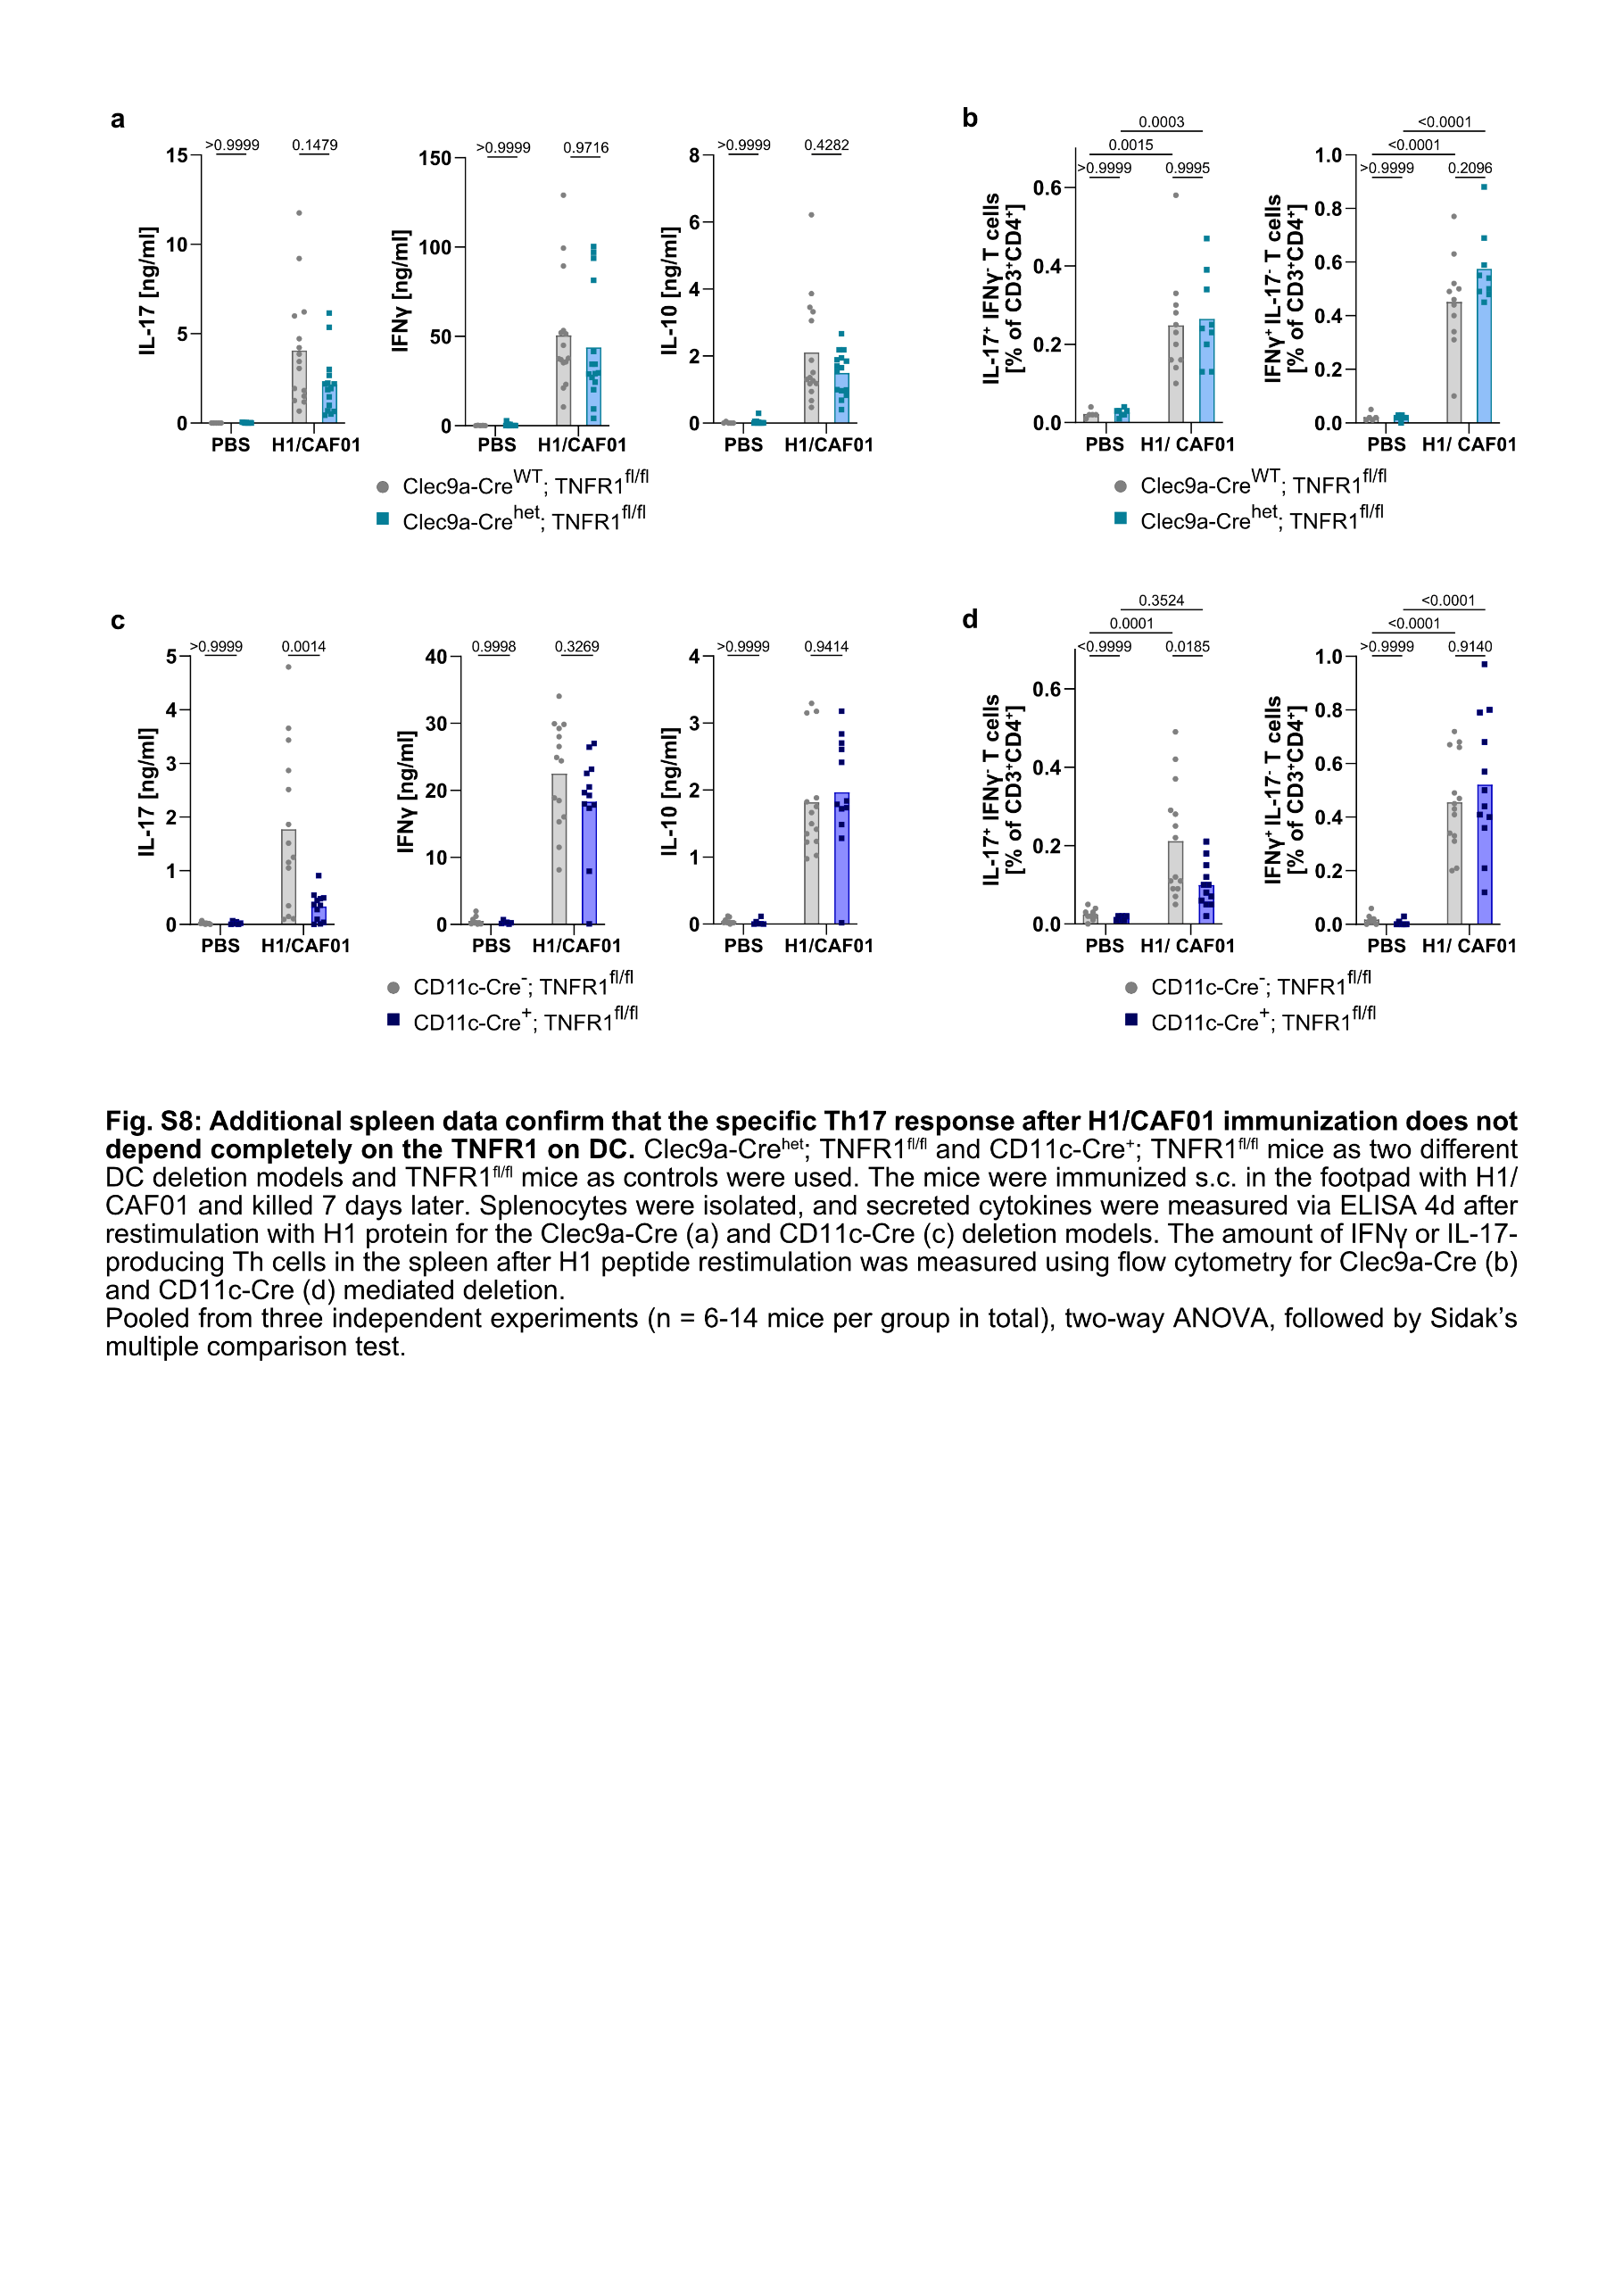


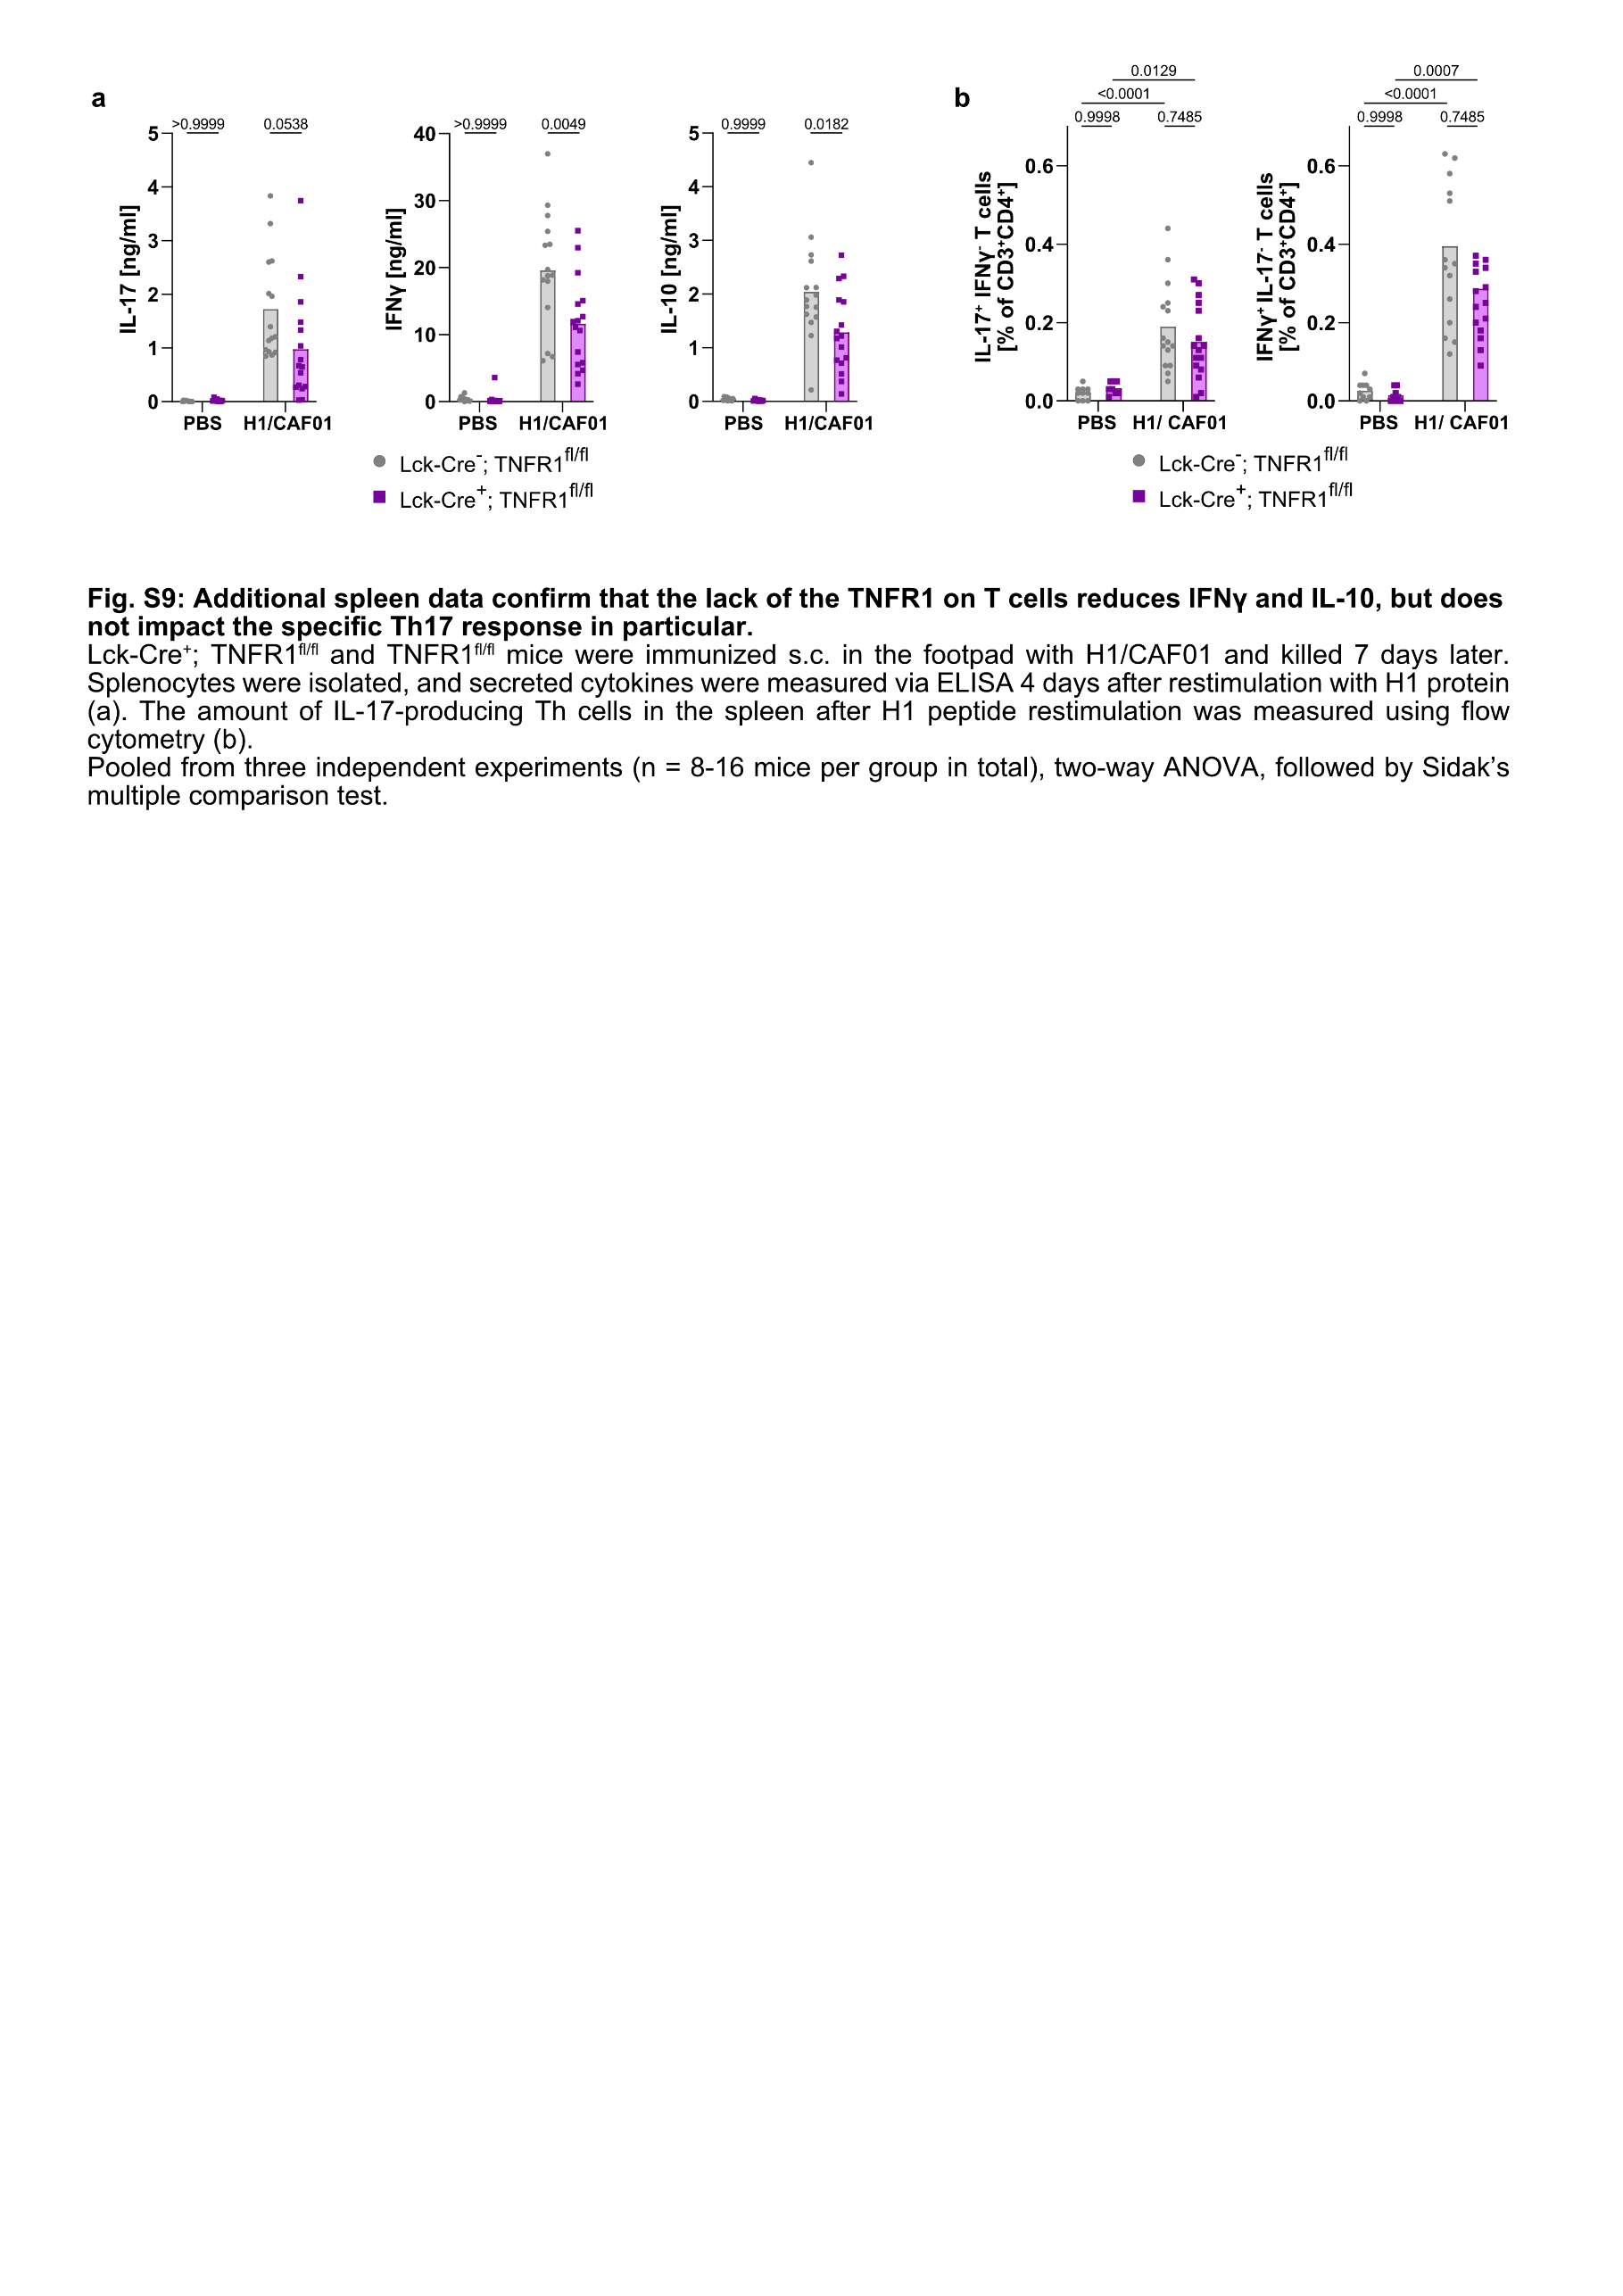


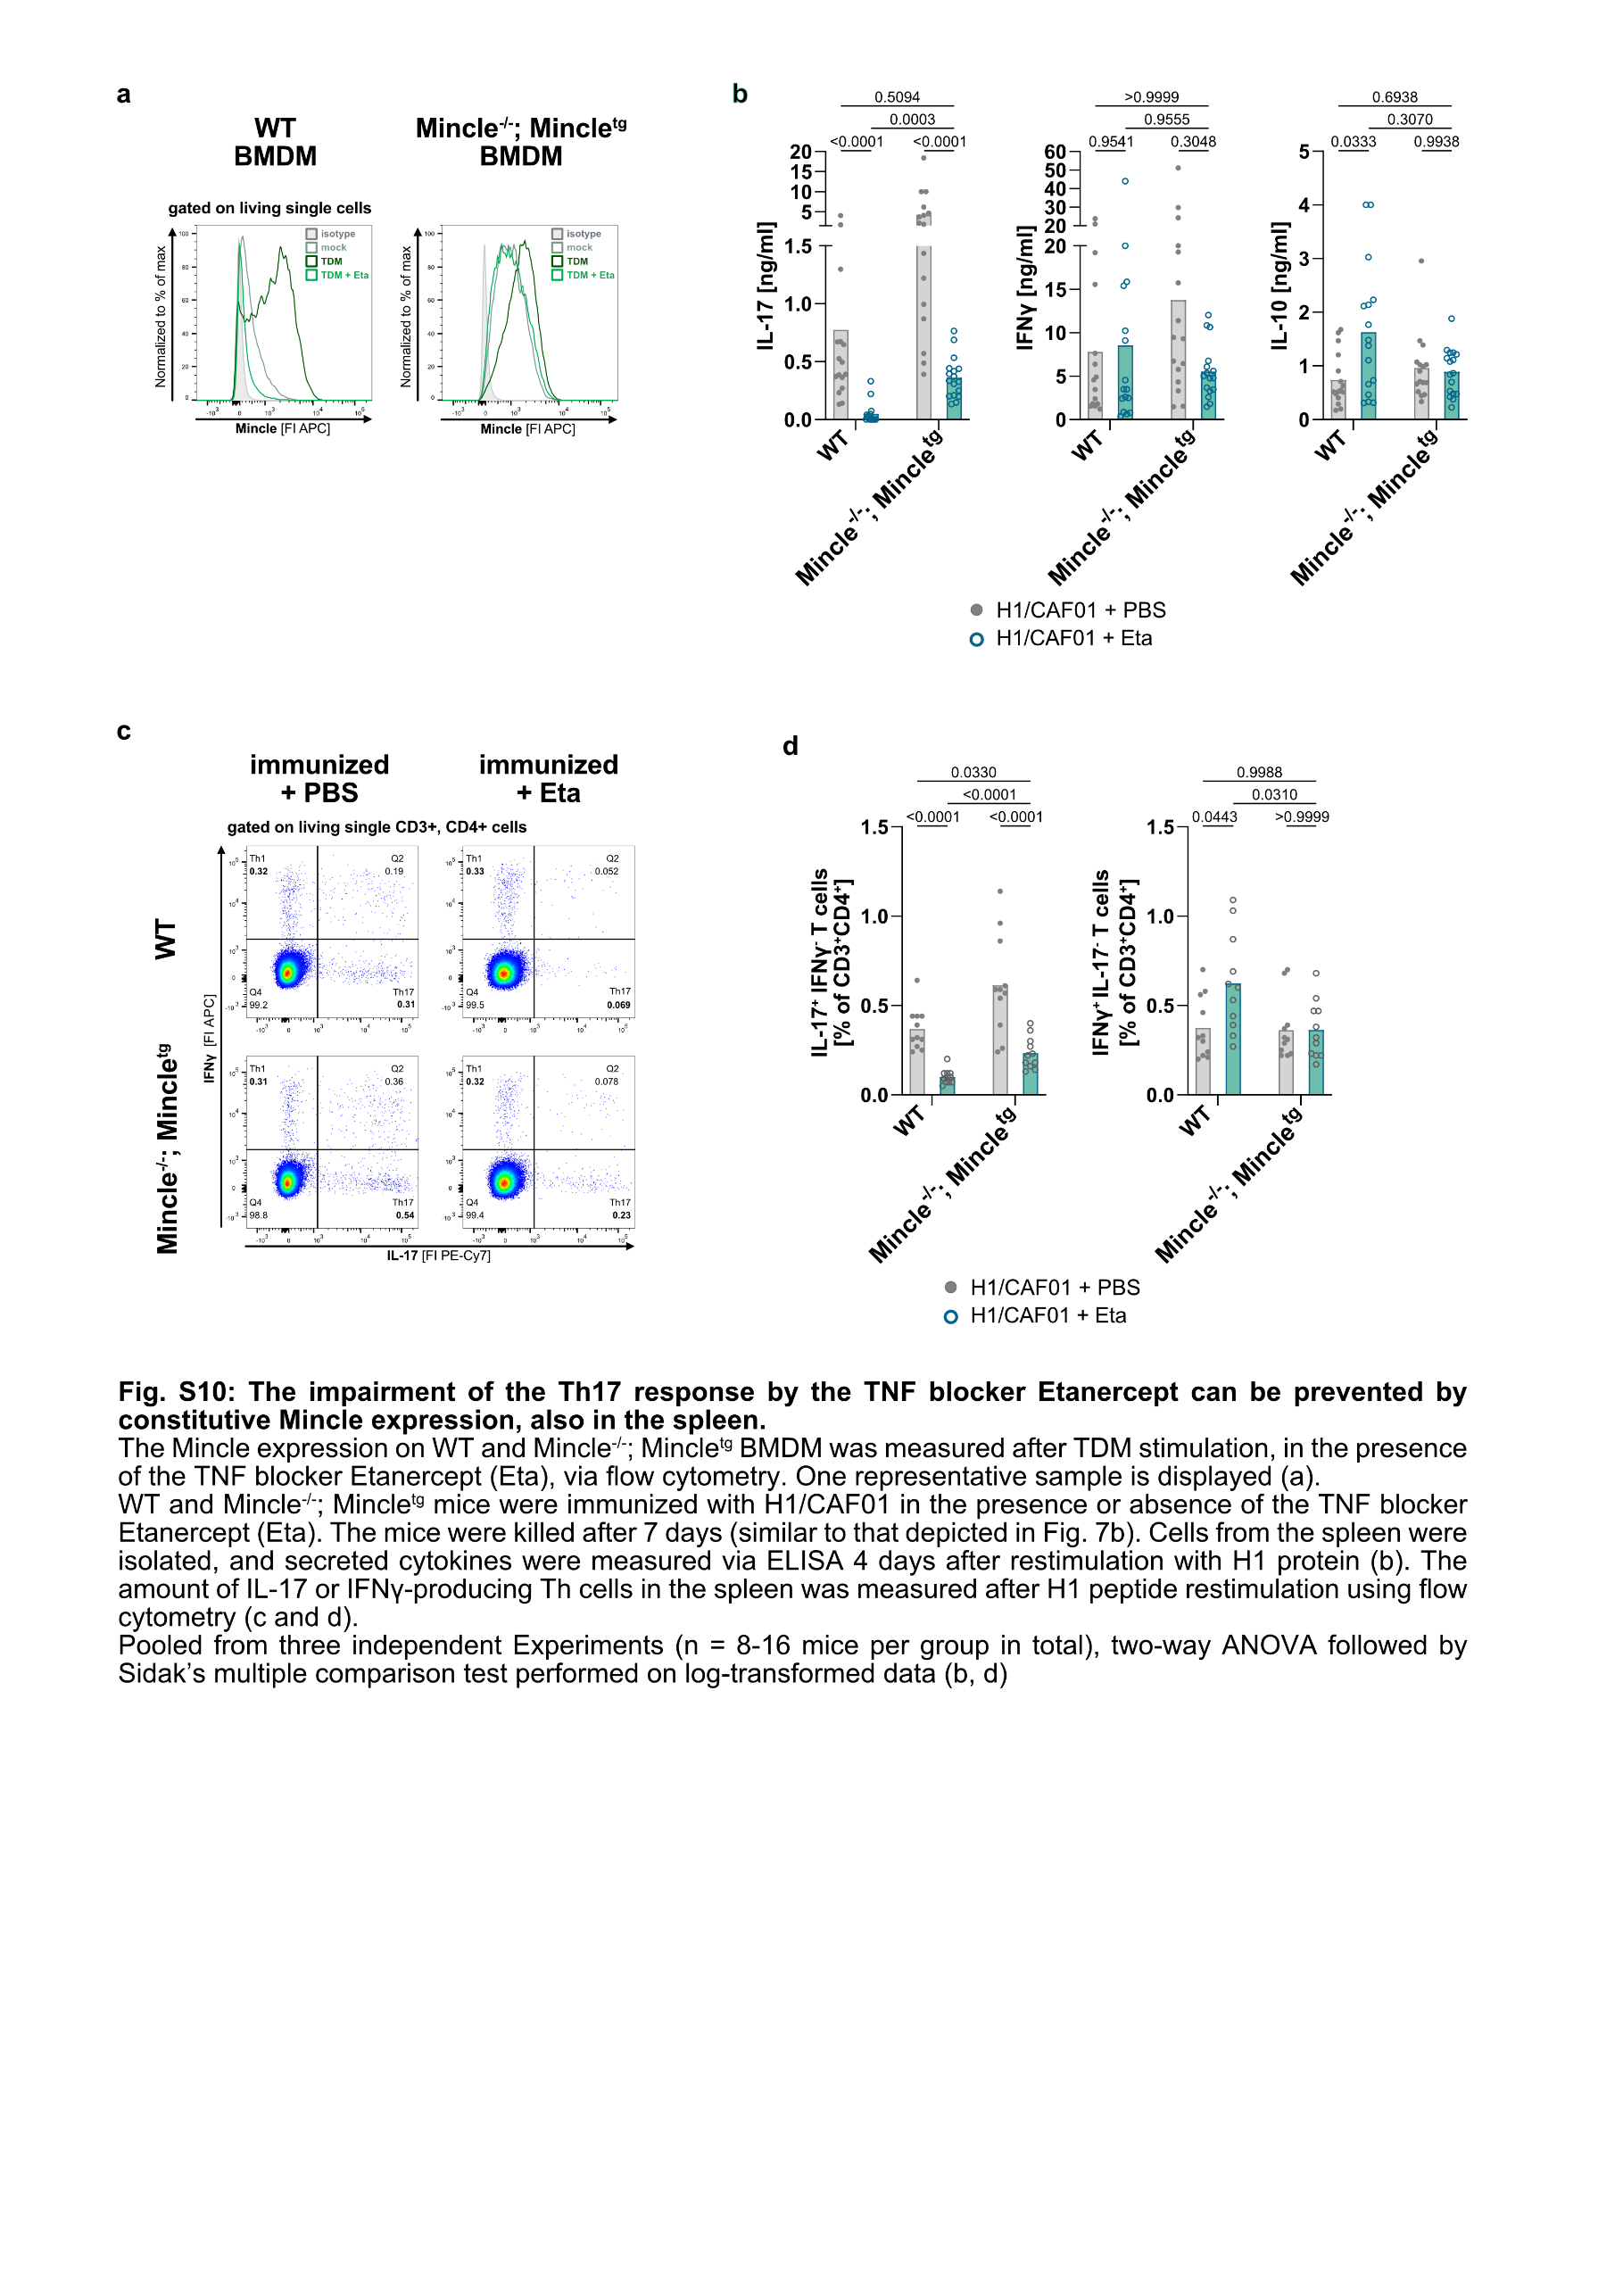


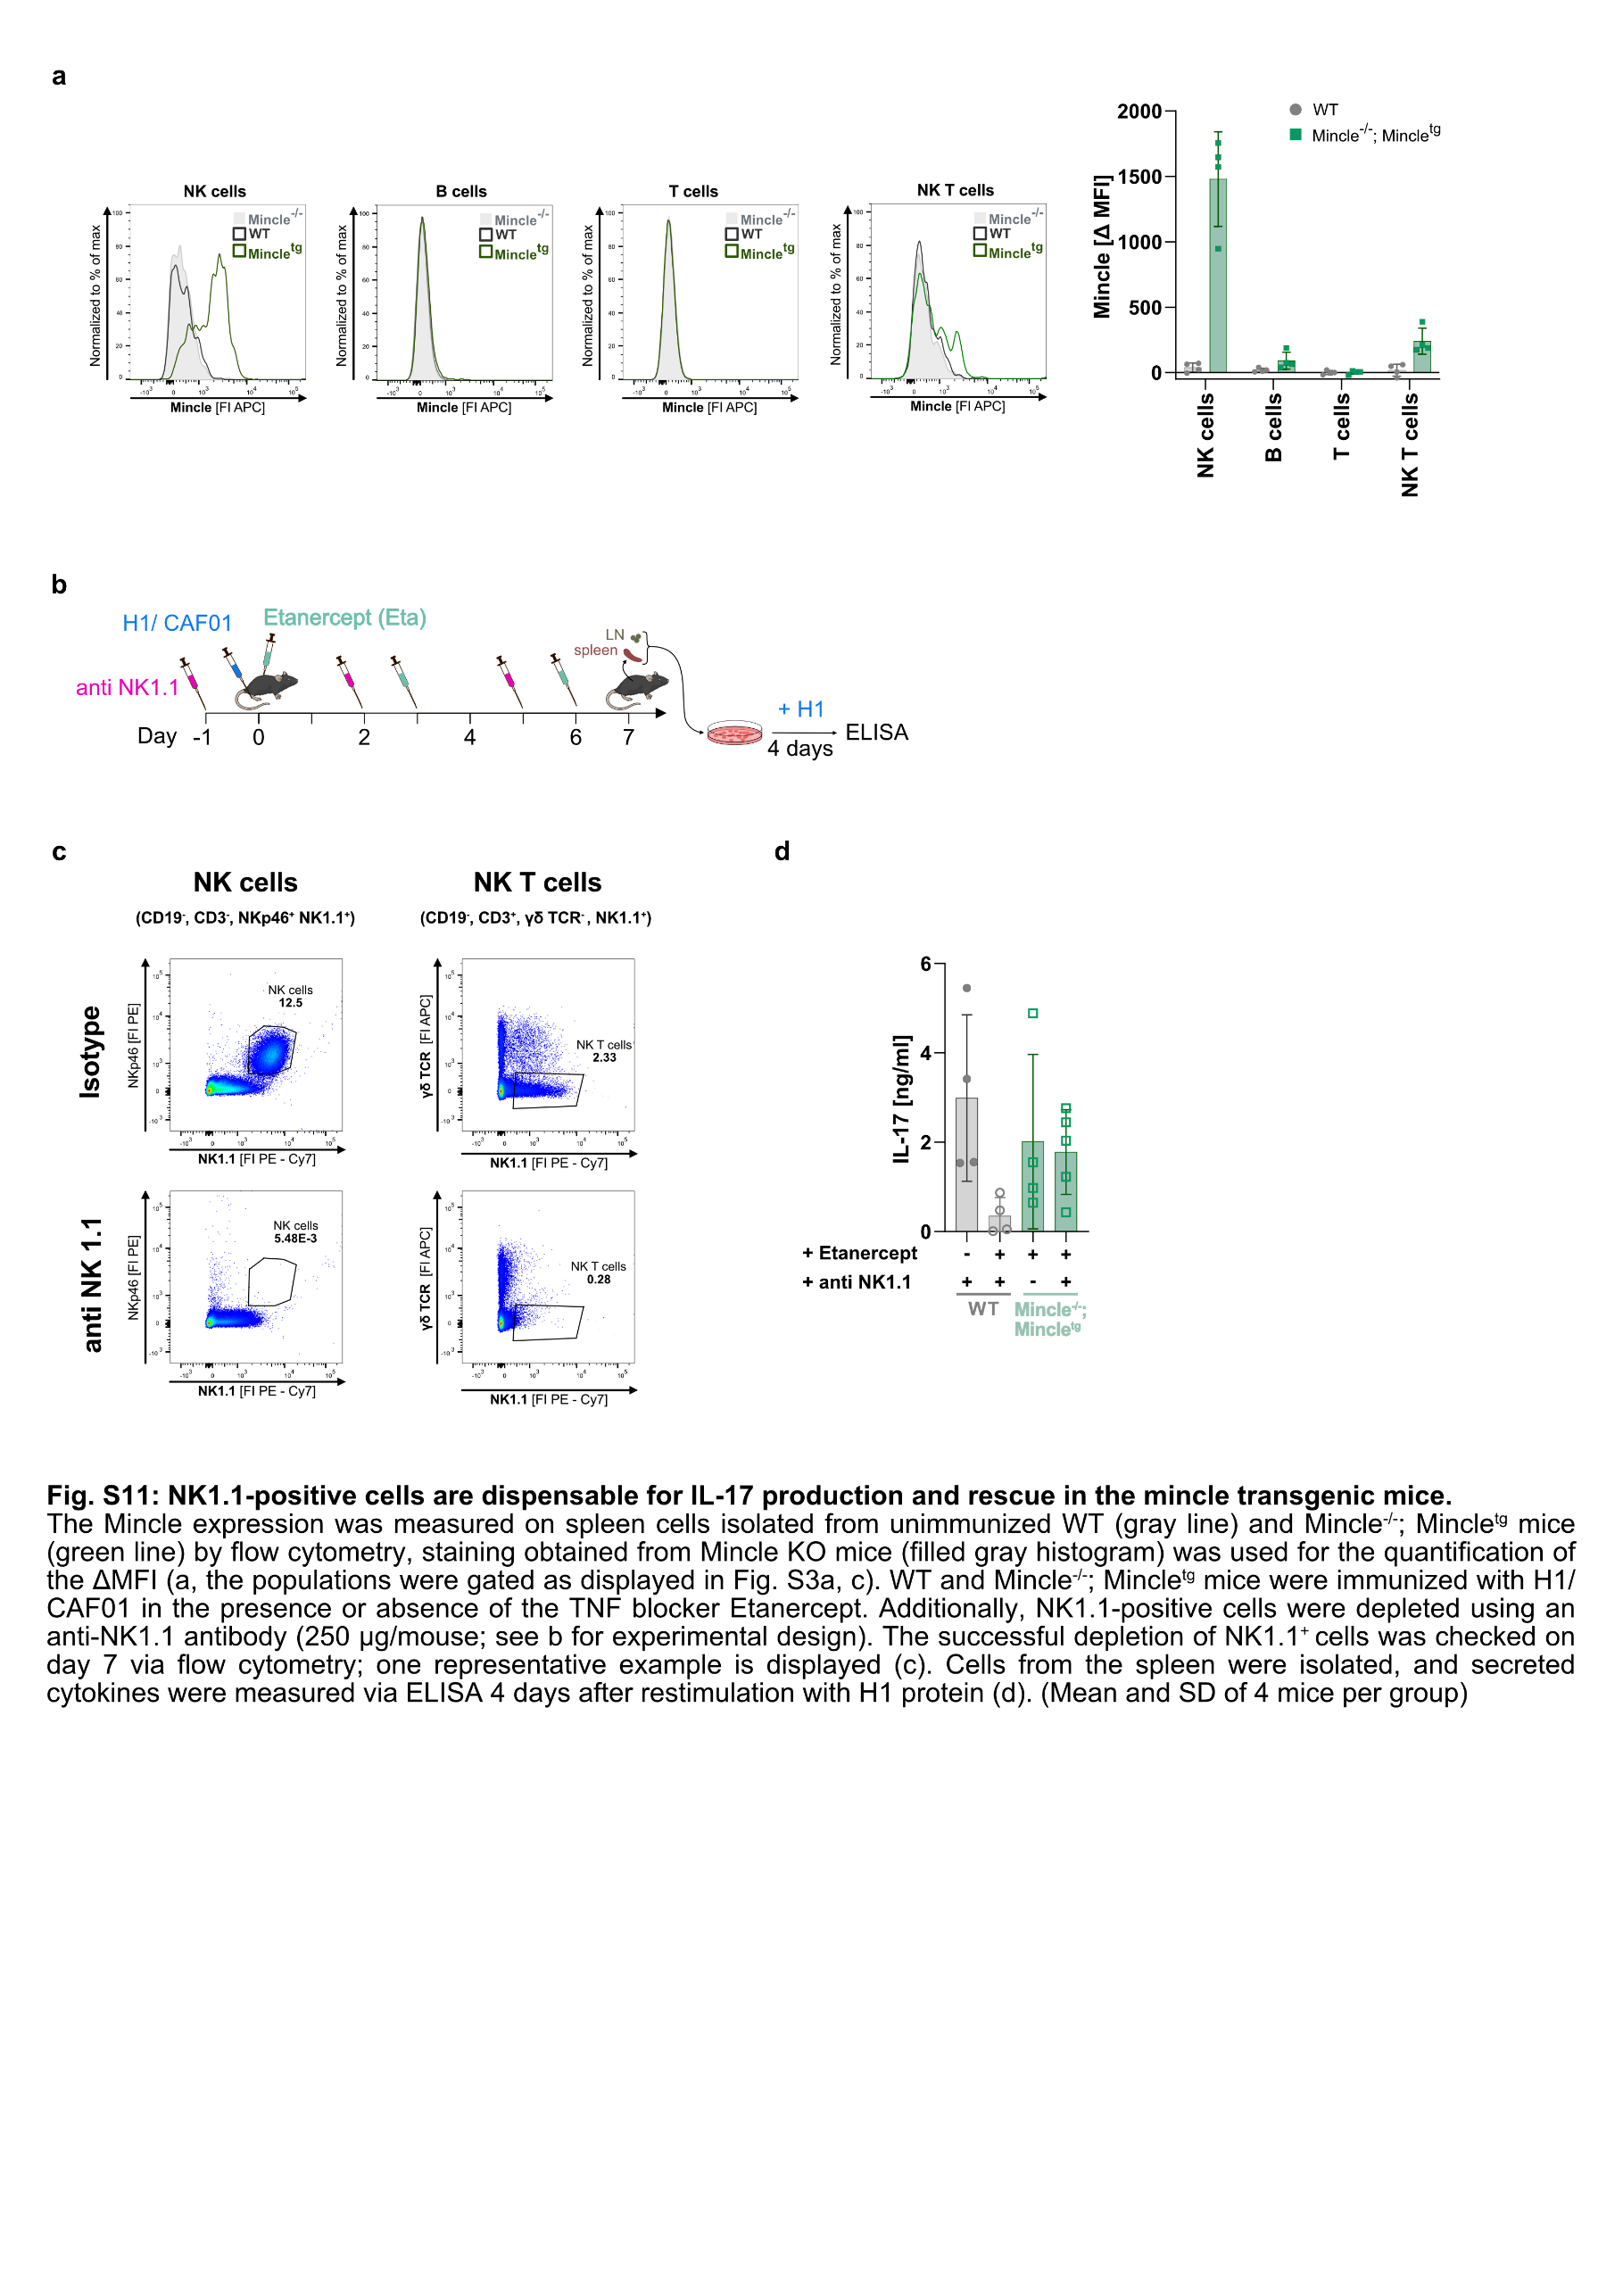

Supplement: Supplementary file 1 [file 9881381685efacfa563ef870.docx]
